# Supplementary material for: Identification of candidate genes and proteins in aging skeletal muscle (sarcopenia) using gene expression and structural analysis
Source: PeerJ. 2018 Sep 5;6:e5239. doi: 10.7717/peerj.5239 (PMC6129146; doi:10.7717/peerj.5239)
Supplement: Table S1 — Raw data [file peerj-06-5239-s001.xlsx]

## Sheet: DEGs
Table S1. The full list of the DEGs(Differentially Expressed Genes)of young and old skeletal muscle samples in both genders
Men									Women
Up-regulated				Down-regulated					Up-regulated				Down-regulated
Prob_ID	p-value	fold change		Prob_ID	p-value	fold change			Prob_ID	p-value	fold change		Prob_ID	p-value	fold change
212371	6.68355e-30	5.62323		1566428	8.51271e-05	-2.27456			233536	2.96782e-07	4.57543		1556136	1.00909e-06	-3.6567
218016	8.50139e-30	5.7423		1561437	0.00012469	-2.34123			244846	7.19698e-07	3.20521		209410	6.85823e-06	-2.06646
217718	2.2244e-29	5.47164		233703	0.000309378	-2.58599			1558034	9.93813e-07	11.5868		213749	0.000162872	-2.8382
224782	3.31563e-29	5.90802		1557014	0.000697884	-2.08274			205445	1.34449e-06	4.09011		1561504	0.000191691	-2.11214
208642	3.4553e-29	5.83542		1561191	0.00175572	-2.46265			207666	1.46786e-06	3.05367		202856	0.000262269	-2.61208
200667	5.923e-29	5.78149		233953	0.00221076	-2.4152			220578	1.47408e-06	2.62167		207794	0.000381401	-2.79972
NaN	1.5945e-28	2.20412		233681	0.00254311	-2.69023			241471	1.50189e-06	2.11118		241674	0.000428563	-2.82455
208030	1.7388e-28	5.76541		220405	0.00712201	-2.57999			204424	2.19309e-06	5.1486		1553873	0.000437666	-2.00093
212299	2.93838e-28	6.0576		1560251	0.00869982	-2.74044			1569555	3.2148e-06	2.75281		229332	0.000476617	-3.08193
200019	6.09848e-28	4.4014		1556170	0.0112565	-2.72698			204846	3.29378e-06	4.05745		1561503	0.000689653	-4.02867
211987	6.43197e-28	6.13815		1555513	0.014427	-2.12398			205913	3.37349e-06	6.47994		221008	0.000807856	-3.60664
201244	6.77948e-28	5.86203		1562999	0.0146175	-2.06			211029	5.19199e-06	2.09296		224826	0.000888732	-2.19724
209377	6.813e-28	5.11392		229271	0.0169696	-2.33961			1556195	6.35913e-06	2.55519		223986	0.000899169	-3.19304
201630	1.02851e-27	6.05464		1569568	0.0198447	-2.11443			236331	6.54119e-06	5.70675		219346	0.00125752	-2.52233
212869	1.22226e-27	2.24381		237477	0.020363	-2.07683			205358	7.75596e-06	4.67286		206677	0.00133217	-2.4204
201994	1.26194e-27	4.64457		215655	0.0230253	-2.39097			209220	7.93427e-06	3.8627		1561553	0.00144414	-2.16783
203244	1.43746e-27	5.90791		211906	0.0250542	-2.1547			243489	8.17646e-06	2.75145		205954	0.00164125	-2.03618
211939	1.50726e-27	3.99432		1559504	0.040518	-2.43776			207277	9.64525e-06	2.00145		1570194	0.00184577	-2.39694
218034	1.5287e-27	5.53501		204614	0.0475589	-2.26855			1563565	1.07809e-05	3.03417		234185	0.00205503	-2.45244
202119	2.15756e-27	6.29944							212883	1.08761e-05	3.53399		219827	0.00214362	-2.07935
212551	2.29939e-27	4.40916							220059	1.14723e-05	6.15482		1562229	0.0023243	-2.11827
208985	2.44335e-27	5.03466							231347	1.17788e-05	4.14269		201538	0.00238677	-2.39621
208943	2.71265e-27	5.58322							1552742	1.2204e-05	7.47058		1555527	0.00241038	-2.42575
223046	2.89126e-27	5.39566							232122	1.30002e-05	2.43552		208083	0.00279167	-2.11268
213371	3.66554e-27	3.60191							224918	1.30423e-05	4.81355		202855	0.0028284	-3.22134
224597	3.72086e-27	5.13358							238956	1.31777e-05	4.49252		209125	0.00309969	-2.2695
217844	4.00498e-27	6.43157							1557466	1.35414e-05	3.67583		244432	0.00391366	-2.83677
204050	5.56e-27	6.37379							222910	1.36197e-05	3.64937		1552417	0.00400205	-2.23881
211678	5.75888e-27	6.3431							233479	1.4881e-05	2.15157		1562287	0.0040836	-2.6315
201658	6.48341e-27	6.49046							222049	1.5204e-05	6.62795		223961	0.00411089	-2.90619
213414	6.4879e-27	4.18795							228421	1.76603e-05	3.0888		217628	0.00411336	-2.10327
223004	7.33117e-27	4.9529							1565162	1.78773e-05	16.3994		242816	0.0041396	-2.09849
220960	7.40088e-27	4.18536							1559393	1.8819e-05	3.62879		201909	0.00443832	-3.27654
211943	7.44817e-27	2.38258							1554640	2.25434e-05	3.48097		221223	0.00469316	-3.17423
201172	9.33484e-27	5.52283							209309	2.30633e-05	8.70179		1567058	0.00495372	-2.63815
224874	9.48185e-27	6.45957							215870	2.31008e-05	4.87219		223377	0.00509209	-3.02007
212306	1.13948e-26	5.97903							1555691	2.35008e-05	3.53136		242516	0.00546475	-2.39258
201413	1.21307e-26	6.01971							207175	2.379e-05	23.072		215929	0.00548107	-2.21499
217896	1.37678e-26	5.95611							210377	2.38272e-05	3.32051		216672	0.00581559	-2.63571
201216	1.71944e-26	6.36339							219398	2.41951e-05	4.8761		1568891	0.00612912	-2.19024
214288	1.72101e-26	4.77396							227434	2.45332e-05	2.22248		206258	0.00621625	-2.01506
203173	1.84242e-26	6.44143							229944	2.67449e-05	4.24054		215286	0.00632922	-2.14689
209503	1.87814e-26	5.72019							232405	2.68141e-05	2.02917		229552	0.00674419	-2.98082
223088	1.99269e-26	5.46663							233064	2.75673e-05	4.23922		242486	0.00695639	-5.20218
208093	2.07987e-26	6.41242							242284	2.79276e-05	3.00755		227238	0.0071789	-2.12208
216274	2.10558e-26	5.84397							220769	2.87543e-05	2.06207		228523	0.00734231	-2.06489
208667	2.25946e-26	5.35906							214633	2.97591e-05	4.15481		205453	0.00736608	-2.06066
216570	2.28008e-26	4.90917							240783	3.21516e-05	2.45472		215962	0.00740103	-2.37632
212072	2.29859e-26	5.72505							243114	3.40127e-05	2.4413		223853	0.00767939	-3.08787
218830	2.366e-26	5.8702							221801	3.41523e-05	4.6316		1563670	0.00958144	-2.20273
225024	2.48914e-26	6.28441							240228	3.43164e-05	5.5707		224579	0.00986688	-2.26062
225268	2.49545e-26	4.78557							1562189	3.78753e-05	2.17783		232838	0.0111016	-2.4302
200627	2.55654e-26	5.43099							233814	3.84727e-05	3.23016		227742	0.0112547	-3.35009
225783	2.72636e-26	5.39491							203184	3.87722e-05	3.821		210513	0.011647	-2.21289
201051	3.26771e-26	6.17393							238188	3.94969e-05	2.50702		1553364	0.0116692	-2.07437
201498	3.48027e-26	6.62436							1562643	3.96878e-05	2.54463		1558885	0.0116965	-2.28255
203197	3.58766e-26	6.51843							229442	4.02635e-05	2.15096		1554152	0.0129825	-2.57738
201546	3.90591e-26	5.90362							232839	5.21782e-05	3.26249		237698	0.0136418	-2.54616
223516	4.08797e-26	6.34595							236473	5.34036e-05	2.99311		232629	0.0139634	-2.78384
223598	4.5835e-26	5.49953							200832	5.36915e-05	20.2231		1553465	0.014123	-2.32505
205812	4.62927e-26	5.45507							204953	5.51968e-05	6.86925		207026	0.0148469	-2.43449
218679	4.69056e-26	5.94676							207177	5.54039e-05	4.40011		202949	0.0162509	-2.10758
218845	5.18997e-26	6.00799							1552929	5.65785e-05	3.24019		234021	0.016769	-2.50543
202121	5.31237e-26	6.55062							215695	6.09469e-05	6.12084		211448	0.0167848	-2.37353
212764	6.63147e-26	5.10341							231736	6.16087e-05	4.53672		208483	0.0172846	-2.19301
208946	6.64286e-26	5.97945							220623	6.1911e-05	2.60074		1554524	0.0173415	-2.00145
203338	7.62583e-26	6.15							241337	6.26348e-05	2.14426		206276	0.0178956	-2.51942
203512	8.29173e-26	5.34313							225792	6.30353e-05	4.79666		202917	0.0179661	-2.67769
202169	8.29745e-26	5.72405							219140	6.33782e-05	7.91686		1561194	0.0184132	-3.3448
212243	8.34403e-26	5.62883							238127	6.72836e-05	3.95758		1561027	0.0186609	-2.08418
209633	8.82359e-26	4.8707							1556786	6.80086e-05	3.76497		1560098	0.0194451	-2.04174
225199	9.2327e-26	5.45565							235708	7.25433e-05	9.44823		211232	0.0199699	-2.19048
221523	1.12634e-25	5.16845							1559760	7.68015e-05	10.1814		241390	0.0208511	-2.22068
201857	1.13425e-25	5.48842							228143	7.87993e-05	3.36261		229967	0.0220819	-3.45316
200004	1.13495e-25	4.44897							1557827	8.01794e-05	2.25395		204614	0.0222202	-2.3422
210460	1.27253e-25	5.85339							235571	8.08014e-05	3.63499		237036	0.0223381	-2.09126
228406	1.36671e-25	4.73519							210643	8.15072e-05	4.18607		209653	0.0235294	-2.07032
201174	1.36872e-25	6.09402							207092	8.25724e-05	8.18115		210670	0.0237731	-2.14023
222432	1.40817e-25	5.15272							213068	8.35717e-05	2.42778		221441	0.0247427	-2.11943
217906	1.40877e-25	5.20444							223836	8.55587e-05	4.3262		205863	0.0248762	-3.4197
224769	1.41567e-25	5.15086							233123	8.72806e-05	2.01663		205960	0.0253136	-3.46334
201166	1.4906e-25	5.72987							215813	9.41264e-05	2.12823		205119	0.0255825	-3.79286
218310	1.49099e-25	6.29884							1560390	9.44857e-05	3.15918		230237	0.0267349	-2.36287
208638	1.62573e-25	6.63897							231022	9.6092e-05	3.12636		237854	0.0276907	-2.4765
202090	1.63646e-25	3.77409							218717	9.96374e-05	2.55259		206699	0.027892	-2.08723
205335	1.66717e-25	5.66349							239093	0.000111462	3.05893		227174	0.0285893	-2.01635
208709	1.67363e-25	5.37864							1561245	0.000112343	3.35982		207008	0.029405	-3.13781
226902	1.74888e-25	4.92108							241309	0.000112413	2.73037		1562630	0.0295957	-2.27616
217730	1.79646e-25	6.09877							1557161	0.000112987	3.2691		1565073	0.0297171	-2.02844
202373	1.8221e-25	5.87101							214297	0.000113606	3.27243		243610	0.0300719	-2.36243
223051	1.8715e-25	5.74979							209568	0.000115413	2.21784		210917	0.0303957	-2.18218
201515	1.91538e-25	6.31176							214376	0.000117811	3.31381		1558611	0.0304375	-2.0708
224885	1.92178e-25	6.09044							213416	0.000122935	3.95644		233477	0.0305425	-2.81003
221519	1.98574e-25	6.03054							208383	0.000124081	13.1106		244240	0.0308427	-2.23997
208761	2.1595e-25	5.69445							228575	0.000125313	2.07197		1564022	0.0309848	-2.0368
203152	2.30592e-25	5.96452							1554076	0.000127882	2.49852		234412	0.0311316	-2.93615
208805	2.30701e-25	4.80095							221805	0.000133993	4.05192		216864	0.0316202	-2.22906
208971	2.32949e-25	5.89944							233392	0.000136088	4.21749		244409	0.0316767	-3.33118
201317	2.47094e-25	5.36672							1569764	0.00014008	3.23764		241567	0.0317675	-2.27811
200003	2.58836e-25	4.50454							206754	0.000140898	2.01229		1555513	0.0328722	-2.1638
200876	2.64842e-25	5.15368							240331	0.000141834	7.50414		238399	0.0329043	-2.4964
219913	2.65475e-25	6.63806							1555097	0.000143195	3.85805		213013	0.0332119	-2.17473
212561	2.8548e-25	5.14424							1556096	0.00014406	8.19981		1568939	0.0339145	-2.27572
212785	2.88126e-25	5.51898							208324	0.000144345	2.07107		1569583	0.0339325	-2.0761
200844	3.31409e-25	5.19119							231348	0.000144717	11.1607		243755	0.0359978	-2.01584
219116	3.34853e-25	7.10147							219304	0.000145644	2.13953		1553070	0.0362885	-2.2588
217836	3.5611e-25	6.6157							215755	0.000149654	2.88302		204959	0.0377801	-2.30496
200631	3.57181e-25	5.3882							239606	0.000151296	6.63074		208288	0.0381126	-2.33951
232683	3.69257e-25	6.16253							214284	0.000153756	2.54426		208084	0.0386026	-2.05444
217955	3.75965e-25	5.72234							226936	0.000154223	2.00503		224421	0.0386895	-2.00195
222251	3.99029e-25	6.2031							243812	0.000156511	2.59406		204007	0.0391873	-2.9054
58900	4.01433e-25	5.77204							236858	0.000159598	2.31515		239855	0.0396009	-2.06278
223329	4.06329e-25	6.59327							237804	0.00016636	6.44057		222501	0.0401734	-3.50859
212408	4.14344e-25	5.66205							214647	0.000168342	2.50627		241022	0.0404492	-2.47739
200963	4.4592e-25	3.56577							211776	0.000168895	2.50141		241096	0.0408767	-2.85783
218557	4.63832e-25	5.55452							1569921	0.000168974	3.52089		237314	0.0409311	-2.11671
200713	4.64356e-25	5.94631							202037	0.000170534	4.75931		207884	0.0416305	-2.21672
213881	4.76843e-25	4.76122							229818	0.00018331	3.53162		242411	0.0417591	-2.17135
211928	4.83149e-25	6.16664							231351	0.00018493	2.80219		1555179	0.0424873	-2.07815
223266	5.05878e-25	4.9312							210895	0.000185256	2.80609		233857	0.0428014	-2.01044
200093	5.28438e-25	4.92855							231631	0.000199307	2.02661		1552967	0.0432164	-2.92078
227873	5.29952e-25	5.998							230269	0.000199493	2.43484		213834	0.0439833	-2.03767
214736	5.84051e-25	5.58128							202821	0.000200124	2.11748		207703	0.0440548	-2.21639
202168	5.87091e-25	5.50104							1561180	0.000200606	3.30338		232891	0.0444756	-2.50985
224777	6.105e-25	6.5601							223839	0.000200935	14.5146		221329	0.0446984	-2.56815
219293	6.56647e-25	5.18253							221200	0.000202819	3.35711		203815	0.04473	-4.29908
214733	7.01318e-25	5.4742							217373	0.000206885	2.1739		1563091	0.0448655	-2.484
203436	7.04232e-25	5.73008							206547	0.000210058	4.07355		229667	0.0450102	-2.17451
212441	7.17731e-25	6.18059							241036	0.000211939	3.36235		224580	0.0454166	-2.81913
212033	7.24969e-25	6.51829							228060	0.000213907	2.07722		1566550	0.0456019	-2.13087
229632	7.264e-25	5.86163							239429	0.000214505	2.16945		1561103	0.0460274	-2.06838
200893	7.28026e-25	6.37434							1555766	0.000215105	3.65108		243223	0.0463313	-2.4569
224938	7.2878e-25	6.71298							233194	0.000217394	3.52628		200796	0.0466433	-2.3123
224928	7.64175e-25	4.34099							202994	0.000219913	2.33084		222515	0.0474606	-2.47072
222585	7.85069e-25	6.04575							225798	0.0002201	2.24287		233445	0.0475476	-2.27035
212117	7.89714e-25	5.9374							210152	0.000224217	2.01406		205050	0.0475478	-3.62051
208846	8.32587e-25	4.44366							231259	0.00022523	2.25268		210444	0.0483776	-2.67046
209787	8.43919e-25	5.6042							210387	0.000226943	2.58846		1563612	0.048661	-2.24469
226385	9.25801e-25	5.08086							227530	0.000228461	2.14214		1553344	0.0492149	-2.171
207812	9.77345e-25	5.83799							207315	0.000230072	2.78355		209611	0.0494573	-2.02338
227124	1.07164e-24	5.38745							201842	0.000232872	3.06016		205442	0.0496905	-2.55171
211945	1.07305e-24	4.89903							240656	0.000236781	3.27654
201230	1.13024e-24	6.04941							1562815	0.000240841	2.43486
207939	1.13122e-24	5.26359							213362	0.000244073	3.87524
211746	1.17749e-24	4.51914							203021	0.000248343	2.68908
202441	1.18987e-24	5.96424							223498	0.00025357	2.95863
200642	1.26851e-24	4.27504							241892	0.000254158	3.08765
212544	1.29894e-24	6.23241							209616	0.000258015	3.3315
207132	1.3711e-24	5.10547							211354	0.000258136	4.09486
200673	1.39717e-24	5.28149							1562878	0.000265822	2.19349
200830	1.41834e-24	5.60507							231650	0.000266891	2.63483
221486	1.47088e-24	5.15438							241263	0.00027003	2.63147
203246	1.60332e-24	6.48316							204154	0.000273596	4.28385
225748	1.61637e-24	5.45785							206693	0.000279922	4.88357
212833	1.62559e-24	4.8474							231050	0.000280685	2.86487
223892	1.6827e-24	5.24929							206930	0.000291453	4.70571
201518	1.75668e-24	6.63764							221969	0.000292415	3.02748
201339	1.79595e-24	5.47863							202291	0.000293665	2.07759
212213	1.83135e-24	5.51619							213558	0.000298612	3.46488
211975	1.85111e-24	7.86798							235601	0.000302402	2.02347
222393	1.88265e-24	5.8213							230252	0.00030667	3.80267
221619	1.90924e-24	5.711							1562074	0.000315631	2.0894
223155	1.9562e-24	5.89837							214456	0.000316366	7.42489
201803	1.96761e-24	5.5713							1556346	0.000325762	2.23073
203529	1.98483e-24	4.98492							237229	0.000327639	2.62242
201352	2.01024e-24	5.18033							223896	0.000332434	3.10286
205022	2.0801e-24	6.2841							229538	0.000332785	2.48936
212702	2.23719e-24	6.68892							219667	0.000333567	6.34002
208685	2.3033e-24	6.22753							1559840	0.000333681	2.52268
201089	2.42361e-24	5.58379							207583	0.000334045	5.62909
200694	2.50954e-24	6.02744							204184	0.000339393	2.55016
219357	2.53696e-24	5.67942							239723	0.000341964	2.69544
200006	2.5852e-24	4.27558							215119	0.000346363	2.55287
214259	2.71463e-24	6.79964							211356	0.000350183	3.96981
222410	2.73759e-24	5.82184							206710	0.000351906	4.69446
228638	2.7912e-24	6.90255							227226	0.000360229	2.65991
211558	2.80105e-24	6.529							238287	0.000360723	5.91931
227473	2.85695e-24	6.439							232114	0.000368031	2.24149
212449	2.87323e-24	4.92356							203400	0.000377751	4.81921
218339	2.8934e-24	5.92935							242025	0.000384763	4.55405
65635	3.22549e-24	6.28893							1570122	0.000385763	2.62672
209422	3.24579e-24	6.71174							226817	0.000388224	2.04386
218097	3.4292e-24	5.22389							230442	0.000390099	2.50199
219206	3.44531e-24	5.89848							207345	0.000393296	2.61738
200025	3.45087e-24	3.25272							1559332	0.000417944	2.00041
225225	3.45199e-24	4.53082							41553	0.000422265	2.04303
226388	3.66645e-24	4.61161							210016	0.000424858	2.78953
212673	3.70766e-24	6.51792							240422	0.000426479	2.66753
1553569	3.7208e-24	2.21644							230422	0.000432545	2.20329
207707	3.77765e-24	5.92868							232446	0.000433901	2.86967
221787	3.85074e-24	5.42979							200636	0.000435055	3.75028
228690	4.23604e-24	4.82202							213764	0.000438077	2.16134
200085	4.37246e-24	5.16661							235086	0.000444843	3.65955
201381	4.45437e-24	5.9219							205385	0.000446353	3.52896
212001	4.46532e-24	5.5553							232676	0.000448284	2.17628
209486	4.65537e-24	6.26219							227300	0.000448284	3.0381
200728	4.7006e-24	5.83355							230313	0.0004483	2.10998
222845	4.96976e-24	5.04397							207336	0.000448382	3.4195
1555495	5.25764e-24	6.15825							213929	0.000458226	2.78604
233186	5.30633e-24	5.83888							222496	0.000460381	2.92324
203738	5.31729e-24	5.79112							224650	0.00046641	10.5229
225329	5.60492e-24	6.5698							1556789	0.000466858	2.41255
208924	5.63646e-24	5.46256							203939	0.000467665	3.57541
209332	5.72797e-24	6.23654							215303	0.000468295	5.12209
228355	6.07151e-24	5.49712							227955	0.000468576	4.52808
212270	6.14187e-24	4.22531							212944	0.000469106	2.26374
201453	6.59985e-24	5.67345							201860	0.000471293	2.30813
201676	6.6145e-24	4.60711							1555778	0.000475819	5.09039
223163	6.66876e-24	6.36225							229465	0.000476586	2.39363
226353	6.85728e-24	5.8381							238411	0.000476703	4.24123
201659	6.94274e-24	4.85497							234472	0.000479661	2.73211
202318	7.41771e-24	5.13474							233291	0.000483851	2.22479
221656	7.5819e-24	6.38666							1554250	0.000493244	2.23346
226942	8.38658e-24	5.1334							232588	0.000495379	2.07465
201421	8.5905e-24	4.9906							1564684	0.000512358	2.63949
202139	8.81324e-24	6.81408							1554606	0.000515036	2.23898
209593	9.0886e-24	5.62045							1554004	0.000516824	2.63666
224702	9.342e-24	5.42573							228679	0.000516941	2.4697
202244	9.38275e-24	4.99581							244276	0.00051828	7.14166
222984	9.72639e-24	5.00415							206902	0.000527994	2.22881
226259	9.75896e-24	6.85921							210704	0.000541757	2.88976
227977	9.98374e-24	6.97043							234594	0.000544888	2.495
209609	1.00219e-23	5.81657							223122	0.000545204	3.90495
218716	1.01492e-23	5.33386							203914	0.000556981	4.65863
201532	1.04006e-23	4.94065							229800	0.000562656	3.25753
224635	1.16065e-23	5.89096							1564964	0.000563059	3.80539
223411	1.18633e-23	5.62671							231410	0.00056392	3.69463
223249	1.1913e-23	6.25301							215523	0.000576791	3.101
34260	1.29963e-23	5.77898							228739	0.000578975	3.79802
225976	1.30496e-23	6.46423							202075	0.00058261	2.19629
211998	1.31073e-23	8.11936							240552	0.000583158	3.29362
224878	1.39754e-23	6.75845							215066	0.000583264	2.73648
213101	1.39784e-23	5.48204							1556606	0.000602682	2.6677
204570	1.41107e-23	3.15574							203305	0.000617811	2.86862
212908	1.47911e-23	7.133							219532	0.000619239	2.28178
217819	1.53364e-23	5.89152							209708	0.000622131	2.24
205824	1.57097e-23	5.74571							1563692	0.000622738	2.8941
200901	1.59643e-23	6.17206							211323	0.00062494	2.06624
1554093	1.62386e-23	5.58066							1554485	0.000628613	3.57791
224764	1.67358e-23	6.16545							239173	0.000631748	2.01443
200840	1.70853e-23	4.80243							1559240	0.000632099	3.44699
201887	1.73037e-23	6.06886							202953	0.000642051	2.80314
208921	1.74151e-23	6.19795							206407	0.000651381	3.1569
200818	1.75581e-23	3.81095							210367	0.000651398	2.25381
226291	1.82656e-23	5.43648							242733	0.00065812	2.61386
225663	1.83045e-23	5.57352							227662	0.00066579	2.06581
208845	1.87214e-23	3.78315							214722	0.000670808	2.15166
216241	1.90248e-23	6.0173							225871	0.00067101	2.45947
212352	1.91364e-23	5.64453							1563077	0.000672156	2.24412
212537	1.92828e-23	4.20863							230366	0.000674721	2.2109
225797	1.94889e-23	6.52255							239370	0.000677913	2.00666
200654	2.0307e-23	6.08808							226789	0.000687757	2.54901
34225	2.05171e-23	6.92535							235938	0.000688698	2.1024
226820	2.24996e-23	5.75031							210964	0.000695188	4.43759
219926	2.42754e-23	5.12689							205942	0.00070089	2.9356
202026	2.46506e-23	4.76196							242881	0.000709784	7.70298
222390	2.46514e-23	6.52238							1569614	0.000713823	2.59266
212711	2.47724e-23	6.19943							225353	0.000718462	2.76738
226703	2.5247e-23	4.99814							216964	0.000719365	2.15266
209384	2.54303e-23	5.73865							231439	0.000719952	3.16111
225878	2.62045e-23	4.45275							225275	0.000724426	6.50441
202568	2.75213e-23	5.47906							1560656	0.000737788	2.25249
221770	2.75874e-23	5.30197							211333	0.00073819	2.81922
217810	2.78456e-23	6.22715							210321	0.00073963	2.37773
212058	2.78665e-23	6.3464							207141	0.000744465	3.51557
213282	2.93585e-23	6.09842							219414	0.000749049	2.09795
203097	2.9407e-23	6.39162							236984	0.000750897	4.51974
209143	3.0036e-23	5.41727							219295	0.000751128	3.70977
212953	3.11126e-23	6.2577							1556951	0.000759833	2.17548
208639	3.15655e-23	6.2007							202707	0.000765112	2.32414
200624	3.16916e-23	5.35282							205569	0.000768575	2.87251
203885	3.23805e-23	6.14121							239001	0.00077206	2.88545
203912	3.24619e-23	5.63902							1556808	0.000791423	2.82672
211623	3.25162e-23	6.51229							230788	0.000791965	11.1838
201485	3.28893e-23	5.16999							224358	0.000796845	6.96588
40189	3.30624e-23	5.98565							1552735	0.000796946	2.23975
219212	3.34699e-23	5.69626							242769	0.000798036	3.07467
220742	3.35102e-23	5.3803							1563480	0.00080905	2.36872
223105	3.35345e-23	4.41135							219773	0.000813093	4.97629
213128	3.38177e-23	6.3914							238481	0.00081483	5.83883
206158	3.49622e-23	3.75989							202036	0.000817995	2.9677
202754	3.55206e-23	7.22787							241253	0.000818497	2.42099
200620	3.56622e-23	5.5444							206818	0.000822774	2.41729
238974	3.60361e-23	6.17672							235877	0.000824087	2.37547
212153	3.60537e-23	6.8941							238723	0.000825687	2.77711
228125	3.88734e-23	6.76258							232338	0.000831517	2.23869
201079	3.94233e-23	5.59742							1562161	0.00083812	2.70932
218761	3.94325e-23	6.34083							209869	0.000840171	6.79093
201210	3.94835e-23	5.1315							243130	0.000841002	2.97815
1555945	4.03425e-23	6.63898							234480	0.000842911	3.18774
213838	4.07505e-23	5.41181							216456	0.000849379	4.16234
212428	4.16734e-23	5.55927							240621	0.000858616	2.69888
218104	4.18503e-23	5.63029							229476	0.000859393	3.43247
201955	4.21663e-23	6.34197							226459	0.000862366	2.17129
220419	4.50517e-23	5.4371							237107	0.000863251	2.36633
213073	4.54934e-23	6.64728							205372	0.000863463	4.76235
241718	4.56876e-23	5.50984							1561075	0.000863868	2.23503
1554078	4.73711e-23	5.46168							1562208	0.000876592	2.20609
214047	4.78053e-23	6.15815							1557991	0.000886225	2.4954
200005	4.84869e-23	5.96853							222454	0.000893696	2.42411
222190	4.87717e-23	5.67766							228161	0.000909876	2.74773
202294	5.01713e-23	7.80147							239369	0.000917325	3.36299
203584	5.04957e-23	5.33331							242671	0.000920258	3.02691
222659	5.11516e-23	6.36483							226769	0.000922932	2.92794
223197	5.16149e-23	5.32761							1564301	0.00093279	2.4413
201160	5.19494e-23	2.99643							225420	0.000934984	2.25293
225351	5.30485e-23	4.87138							235352	0.000935139	3.11196
208687	5.30534e-23	3.51413							220736	0.000937904	5.16958
218403	5.32102e-23	6.33186							230391	0.000940429	2.02381
222683	5.41627e-23	6.00174							1558342	0.000944752	2.12231
222735	5.43241e-23	5.13338							1566190	0.000945347	2.76676
214035	5.63896e-23	6.23921							232853	0.000949467	2.22603
218291	5.67587e-23	6.32516							209840	0.000971232	3.31008
212716	5.81867e-23	4.31356							238478	0.000983992	2.34878
218570	6.11496e-23	6.50123							240458	0.000989386	2.00699
201758	6.12925e-23	5.53981							240460	0.00099392	4.13476
204979	6.19534e-23	4.00585							211039	0.000998346	2.1442
201717	6.2086e-23	6.27807							243319	0.00100347	2.56833
202442	6.32847e-23	6.22653							244258	0.001006	3.16249
212643	6.35989e-23	6.03836							226237	0.00102001	3.47301
202559	6.35994e-23	5.99299							206143	0.00102298	3.31191
217740	6.45858e-23	3.53647							221796	0.00102562	5.89934
226581	6.56675e-23	6.48092							236184	0.00102827	2.30576
209009	6.65526e-23	5.08779							1552321	0.00103306	2.21843
209786	6.86454e-23	5.56885							203571	0.00103369	2.41945
223526	6.95323e-23	6.36114							1557869	0.00103807	2.91306
217938	7.01682e-23	5.42482							234442	0.00104511	4.11908
223117	7.18801e-23	6.40269							226804	0.00104968	2.23183
213208	7.44307e-23	6.73666							223427	0.00105078	3.56019
235589	7.50989e-23	6.8688							240109	0.00105091	2.82006
225429	7.59912e-23	7.48458							207577	0.00105863	3.14388
223886	7.65366e-23	5.36183							238919	0.00106057	2.20535
229384	7.67562e-23	6.81585							240838	0.00106184	2.36833
223428	7.68152e-23	5.22809							1559409	0.00106423	2.96153
213215	7.69485e-23	5.20231							1564212	0.00106579	2.24551
200933	7.75245e-23	3.26331							241966	0.00106668	2.40596
203659	7.75346e-23	5.76842							230130	0.00107304	2.72823
201138	7.83666e-23	6.33313							204105	0.00107808	4.3868
202829	7.9452e-23	5.05658							1561361	0.00108119	2.16252
37950	7.98004e-23	5.77011							1559618	0.00108943	2.45362
221531	8.19594e-23	5.51281							222771	0.00108988	6.71694
225550	8.3512e-23	7.14682							214582	0.00109493	4.95206
214473	8.44454e-23	5.37649							205030	0.00110339	5.2134
209106	8.49023e-23	7.15369							241473	0.00111322	2.84431
1553979	8.51599e-23	6.46548							229915	0.00112384	2.55749
223443	8.52835e-23	6.01256							1554044	0.00112989	3.29226
225844	8.54345e-23	6.44609							243611	0.0011364	2.45334
221839	8.5472e-23	6.616							1560637	0.00113688	2.63278
223011	8.60118e-23	5.43095							1552430	0.00114753	3.35629
208974	8.64499e-23	6.07403							227491	0.00114983	2.90501
1554342	8.69501e-23	6.1175							238409	0.00115069	2.06053
203487	8.90299e-23	5.63252							224367	0.00115135	2.42326
212204	8.93717e-23	6.00324							1561271	0.0011652	2.30361
211988	9.03271e-23	6.75639							228260	0.00117177	4.39307
226414	9.06784e-23	5.39327							210848	0.00117748	2.90188
213803	9.09895e-23	5.51929							223170	0.00118063	2.24784
207628	9.25251e-23	6.06651							219519	0.00120382	2.6728
227507	9.91579e-23	6.1121							232282	0.00121631	3.2005
203006	1.00148e-22	5.9041							214038	0.00121889	6.83335
201343	1.01097e-22	5.61754							223952	0.00123105	2.32115
209045	1.05942e-22	5.62783							221445	0.00123501	2.37456
202288	1.07672e-22	5.32082							219863	0.00123965	2.64843
221751	1.0786e-22	5.86421							242546	0.00124397	4.73378
40465	1.08014e-22	5.23186							228224	0.00125736	2.36389
218315	1.0821e-22	5.72378							240424	0.00127341	2.12105
218628	1.08976e-22	5.18202							1570124	0.00128218	2.37326
224653	1.13655e-22	5.68458							1560025	0.00128527	3.24552
225552	1.14269e-22	5.06421							236921	0.00128557	3.01554
218123	1.16071e-22	6.638							211548	0.00128732	4.01247
226692	1.1674e-22	6.47769							229014	0.00129452	2.11503
202347	1.16833e-22	5.92901							1553220	0.00129923	2.60111
203138	1.18646e-22	5.74138							210896	0.0013027	2.45789
212129	1.19346e-22	5.39018							234433	0.00131993	3.21059
224284	1.20739e-22	5.67869							222901	0.00132947	2.10425
202727	1.216e-22	5.37719							238850	0.00133399	5.82509
228783	1.23818e-22	6.35429							212377	0.00133437	2.00121
226529	1.25e-22	5.92729							215185	0.00134318	4.13327
212095	1.25469e-22	6.05958							1559483	0.00134421	3.22035
36936	1.29587e-22	6.00217							1554999	0.00136045	2.56137
226170	1.2963e-22	6.66795							215363	0.00136109	3.07863
224913	1.30072e-22	6.06105							240403	0.00136529	3.21048
205384	1.30562e-22	5.07965							241856	0.00136711	4.63796
212205	1.32281e-22	5.31553							1556095	0.00136783	8.51799
202417	1.33493e-22	6.45736							1555431	0.00136984	2.70578
202802	1.35412e-22	6.62296							238297	0.00138061	2.92414
46256	1.38091e-22	5.98003							1559131	0.00139323	2.34015
200918	1.38651e-22	5.57565							244111	0.00139549	3.08219
208780	1.39826e-22	4.70571							214357	0.00140442	2.48156
231846	1.40052e-22	6.04761							221900	0.00140543	2.83053
218525	1.40365e-22	5.81346							235733	0.00141075	2.5599
228332	1.43335e-22	6.00148							243924	0.00142633	2.31935
221434	1.45534e-22	5.32949							206458	0.0014369	2.38697
1558201	1.47734e-22	5.77905							221916	0.00143726	3.10511
204809	1.48966e-22	5.59911							235616	0.00143886	2.22563
211933	1.49662e-22	7.02994							1554348	0.00143978	2.34791
208922	1.51109e-22	5.96499							1562638	0.00144405	2.1223
202337	1.53864e-22	5.38176							1553710	0.00144811	2.95011
201100	1.61427e-22	4.97574							209351	0.00146214	2.48524
226719	1.64099e-22	6.37407							216714	0.00147382	4.29897
202530	1.72144e-22	6.7415							235945	0.0014816	2.36929
225244	1.74774e-22	5.84798							229635	0.00148173	2.5485
213687	1.75166e-22	4.29836							214436	0.00148637	2.33999
212946	1.76496e-22	5.90773							231038	0.00148733	2.35666
201840	1.7796e-22	5.53476							1562371	0.00148776	3.99519
222417	1.8057e-22	5.747							232798	0.00149676	2.69967
201786	1.8403e-22	7.02507							218824	0.0015058	3.03678
227466	1.86062e-22	5.41625							238055	0.00150589	2.39649
203430	1.94413e-22	5.03435							202770	0.00151035	2.15689
217993	1.98072e-22	5.76804							1563104	0.00151532	2.12712
204405	2.00933e-22	5.48604							238013	0.00152947	3.77601
225267	2.03467e-22	4.71367							1558820	0.00153286	2.0948
213086	2.08261e-22	5.70524							219642	0.00153375	3.05263
202181	2.09007e-22	6.43048							1552584	0.00153789	3.37336
200686	2.10228e-22	5.68332							243681	0.00154243	2.47642
202197	2.1533e-22	6.49837							1569287	0.00154737	2.17995
224731	2.17286e-22	5.57269							239345	0.00154825	4.29695
57082	2.17485e-22	5.62283							221371	0.00155561	2.84236
213151	2.17544e-22	5.56762							1554193	0.00155707	2.59009
216212	2.19852e-22	6.03343							234645	0.0015592	3.02468
227730	2.2342e-22	6.03149							205758	0.00156059	2.94209
203137	2.2538e-22	6.198							239353	0.00156276	2.41901
200820	2.27697e-22	5.12271							44040	0.00156538	2.31344
201637	2.35601e-22	4.55267							230278	0.0015782	3.57673
203306	2.41161e-22	5.78423							217428	0.00158241	3.20278
212453	2.4431e-22	5.4594							209631	0.00158471	3.80291
201014	2.45626e-22	4.94726							1557056	0.00158781	3.93206
223215	2.50663e-22	6.30541							202454	0.00159082	3.32824
225514	2.53195e-22	6.17774							232898	0.00159512	2.04777
224897	2.53489e-22	5.27931							206641	0.00160194	3.30673
213311	2.61289e-22	6.56122							221337	0.0016064	2.26757
224628	2.62185e-22	5.66621							1561595	0.00160694	2.26301
201225	2.66805e-22	5.94961							1555457	0.00161411	2.44063
208857	2.73531e-22	4.86914							244758	0.00162154	2.45835
225771	2.78857e-22	6.27594							218726	0.00162865	2.20665
219590	2.80197e-22	5.51782							205239	0.00163514	2.9596
230656	2.81239e-22	6.23507							243403	0.00163652	2.36647
200936	2.81797e-22	4.11721							205579	0.00163711	2.90714
202749	2.81886e-22	5.75607							213920	0.00164827	2.54847
209180	2.84353e-22	5.12049							212816	0.00166589	2.78057
228446	2.95462e-22	5.80904							205686	0.0016676	3.07248
209181	2.95661e-22	4.98541							225975	0.00168505	2.55383
208774	2.9586e-22	6.22113							1561738	0.00170531	2.84849
218715	2.97863e-22	6.55019							235776	0.00170597	3.27276
208672	3.01856e-22	6.03799							209735	0.00172092	3.28249
202056	3.02747e-22	5.50221							205299	0.00172151	4.12647
217964	3.02817e-22	5.47653							243810	0.00172419	2.15599
202592	3.03728e-22	6.71209							229096	0.00174614	2.69748
210886	3.08922e-22	5.88235							204537	0.00174722	2.6486
210774	3.09117e-22	4.4765							1570503	0.00174784	3.03337
226080	3.1178e-22	6.59348							234279	0.00176563	3.06902
223406	3.12849e-22	5.89351							220719	0.00177192	2.3453
202209	3.16777e-22	5.62218							1552619	0.00177616	2.38039
218285	3.17691e-22	5.07588							214913	0.00178135	5.2657
212089	3.22412e-22	5.1862							242146	0.00178431	2.08568
218641	3.3181e-22	6.75827							203418	0.00178841	2.09716
202670	3.31867e-22	6.16315							224166	0.00179388	2.7845
212730	3.42629e-22	3.79075							232412	0.00179516	2.64623
210776	3.43591e-22	5.94821							1556643	0.0017964	2.1297
200639	3.43632e-22	6.7542							1558995	0.00181003	2.1022
218552	3.51919e-22	6.56862							242037	0.00181039	2.5978
203605	3.51948e-22	5.92814							226803	0.00183005	2.83641
201336	3.73007e-22	5.43274							237727	0.00183756	3.30132
225358	3.78703e-22	5.41144							1566597	0.00184423	2.72495
225507	3.80275e-22	7.03184							203988	0.00184659	2.01011
203351	3.88417e-22	5.70645							205573	0.00186336	2.45091
214363	3.92029e-22	6.1234							204920	0.00187421	3.33503
208979	3.98329e-22	6.8168							214912	0.00187869	2.10841
1555579	4.06641e-22	6.31398							213248	0.00188715	2.11105
209337	4.07296e-22	7.18055							1560531	0.00190316	2.013
213794	4.11128e-22	5.55206							223843	0.00192028	2.82427
227338	4.13273e-22	6.60659							209686	0.00192776	6.59034
213019	4.16128e-22	6.41641							234634	0.0019299	2.33195
201180	4.16789e-22	5.63774							223658	0.00194073	2.21871
218520	4.18782e-22	5.3543							239378	0.00194444	2.04142
219489	4.2026e-22	5.59143							242253	0.00194542	2.89866
225261	4.22132e-22	6.35925							209894	0.00194734	3.88768
201854	4.22204e-22	6.21735							202992	0.00195711	4.89721
224647	4.24599e-22	4.97174							216066	0.00196104	2.30287
226861	4.25259e-22	5.45427							1558477	0.00197341	2.70558
225941	4.40275e-22	5.58846							236364	0.00199713	3.00767
224664	4.42861e-22	4.94325							203913	0.00201019	6.66881
208655	4.49805e-22	5.15354							1560520	0.00201108	2.11454
202396	4.50181e-22	6.29633							219976	0.00202475	3.36934
224781	4.551e-22	6.15242							1559910	0.00204665	2.02002
220079	4.62484e-22	6.21304							205286	0.00205428	2.81444
209302	4.70164e-22	5.35046							244807	0.00205433	2.9002
212149	4.70677e-22	5.86556							207400	0.00206136	2.28253
202845	4.75307e-22	5.116							1557543	0.00207086	2.40169
223762	4.75941e-22	3.96136							216147	0.00209148	2.99984
210632	4.98172e-22	5.97096							1566448	0.00209271	2.14715
206846	4.98581e-22	6.67357							203636	0.00210195	2.3561
200072	5.05478e-22	6.37724							219552	0.00210956	2.66081
209092	5.07499e-22	5.81944							220663	0.00212229	2.27289
214937	5.08274e-22	6.56646							1560416	0.00212326	3.04249
208746	5.13571e-22	4.46668							1556190	0.00214083	3.3754
221691	5.16749e-22	5.96973							1554273	0.00214358	2.97876
202227	5.23454e-22	6.42256							213382	0.00215473	3.31908
208289	5.23613e-22	6.89503							219666	0.00215664	2.15107
217831	5.24375e-22	5.4637							241030	0.00216005	4.02396
33760	5.25939e-22	4.99339							226875	0.00216147	2.52168
218278	5.25955e-22	5.85371							219684	0.00216896	2.19899
226527	5.37559e-22	7.01304							204501	0.00220216	2.15692
211609	5.38331e-22	5.43554							1556054	0.00220582	4.23654
207738	5.39101e-22	5.73883							215288	0.00222008	2.18859
241938	5.45725e-22	7.74344							203645	0.00222324	2.7442
201018	5.49643e-22	6.19006							204933	0.00222984	2.81824
1559946	5.55909e-22	5.56614							205893	0.00227202	4.64521
204168	5.59007e-22	6.06688							1560697	0.0022769	2.06211
216981	5.64646e-22	6.04092							222317	0.00228819	7.41533
231948	5.7024e-22	5.89003							233799	0.00229837	2.76292
200054	5.71236e-22	5.5587							240195	0.00230364	2.42638
221637	5.77892e-22	5.77303							242828	0.00230412	2.70022
200060	5.83678e-22	5.91264							209841	0.00230728	4.41834
209744	5.88152e-22	5.64355							231040	0.00230857	3.9511
221877	5.8842e-22	5.74241							215039	0.00231078	3.27047
206612	5.90341e-22	6.44601							215915	0.00231537	2.12413
39729	5.948e-22	4.13883							218901	0.00231827	2.14748
202641	6.04922e-22	5.99911							241931	0.00231893	2.33171
213801	6.08782e-22	3.704							224518	0.00232533	2.93909
201899	6.0885e-22	5.00248							1570106	0.00233158	2.38738
218958	6.13057e-22	6.51719							227230	0.00233335	2.84027
222954	6.13765e-22	5.71697							215228	0.00234369	4.21977
212343	6.30841e-22	5.65177							1569962	0.00234869	2.39066
201077	6.33842e-22	5.22992							1556236	0.00234958	2.31238
224593	6.39581e-22	6.13447							240043	0.00235741	2.78824
201477	6.50957e-22	7.0995							215657	0.00236966	2.80576
216321	6.53965e-22	5.98098							1553706	0.00237811	3.57924
226203	6.62872e-22	7.41609							1553229	0.00238586	2.5441
214699	6.69175e-22	5.92673							223280	0.0023874	2.03305
208680	6.70775e-22	4.7476							229464	0.00245064	5.72049
201780	6.72014e-22	6.92108							241758	0.00245481	2.40408
209814	6.83223e-22	6.41075							217388	0.00246593	4.16312
203565	6.9077e-22	6.87867							235658	0.00246641	2.7465
224577	6.94064e-22	6.22142							1560891	0.00246662	2.48105
204905	7.02077e-22	5.64609							203637	0.002473	2.72834
227639	7.25496e-22	6.32809							204111	0.00247787	3.83966
201941	7.29111e-22	5.67675							226834	0.00248307	6.55345
219176	7.29816e-22	5.89184							241982	0.00249861	2.54203
212910	7.41275e-22	6.1868							1557740	0.00250485	2.82215
213750	7.42796e-22	5.35324							238220	0.00250526	2.49099
208745	7.44996e-22	5.8074							230433	0.0025272	2.2872
218682	7.4591e-22	5.55461							240489	0.00252879	2.12163
203660	7.46229e-22	6.26908							220330	0.00252925	4.06177
218455	7.50349e-22	5.12252							208421	0.00253161	2.21083
200871	7.50699e-22	4.59032							237663	0.00254367	2.53873
208722	7.52377e-22	5.74225							243940	0.00255403	3.11793
218639	7.58474e-22	5.94965							223838	0.00256368	4.61666
218970	7.71144e-22	4.37826							1568887	0.00257039	2.07359
200732	7.71948e-22	4.39344							215356	0.00257614	2.38959
225144	7.75733e-22	5.70586							1552519	0.0025847	3.51449
219778	7.8749e-22	5.98155							223784	0.00258696	4.02406
200082	7.94673e-22	4.40827							205317	0.00259115	2.6244
226684	8.0506e-22	6.50859							1556496	0.00259233	2.35096
243346	8.08314e-22	4.98649							213790	0.00260029	2.90886
202055	8.2251e-22	4.73798							1555985	0.00260937	2.53088
226544	8.2729e-22	6.99031							221795	0.00262063	5.01972
218448	8.2929e-22	5.95907							241151	0.00263975	3.37117
203599	8.3723e-22	5.99313							205792	0.00264171	2.19522
222804	8.40773e-22	5.87066							212679	0.0026447	2.18454
202704	8.59197e-22	5.29907							237035	0.00266059	2.18205
201093	8.73591e-22	4.8147							236534	0.00266816	2.55888
215171	8.80497e-22	4.64132							226756	0.00266849	2.63444
225519	8.81418e-22	5.79765							1561238	0.00269595	2.30911
203897	8.85771e-22	6.11383							220532	0.00273792	2.0961
200027	8.98726e-22	4.69159							240882	0.00274212	2.6793
224648	9.01365e-22	6.16317							236398	0.00274264	2.84741
217781	9.07617e-22	3.95317							205590	0.00277163	3.09373
223279	9.23472e-22	4.92991							244162	0.0027722	3.23051
225512	9.37198e-22	6.53089							222392	0.00278199	2.63708
223042	9.38072e-22	4.22823							234314	0.00279982	2.98968
209510	9.55994e-22	6.10501							205083	0.0028202	3.83445
203519	9.56887e-22	6.54718							224038	0.00282229	2.27008
223154	9.67936e-22	6.37912							1556240	0.00284156	2.56844
200764	9.78478e-22	6.45026							214858	0.00284676	2.29328
213153	9.8775e-22	6.58618							238433	0.00285808	2.47384
203051	9.9975e-22	6.10358							1556983	0.00285896	2.2271
200746	1.00266e-21	5.71329							214945	0.00286252	3.32177
226660	1.00785e-21	5.84436							1570271	0.00287264	2.3052
205787	1.03672e-21	5.78119							207617	0.00287806	2.25321
224334	1.04366e-21	6.1891							207376	0.00288592	2.73876
222821	1.04879e-21	5.68495							1557837	0.00291133	2.22689
202522	1.05687e-21	6.45375							234184	0.00291218	2.72484
224732	1.0653e-21	6.60276							1558695	0.00291452	2.37603
218256	1.07374e-21	5.4865							216029	0.0029185	2.10521
221527	1.07482e-21	6.55963							229516	0.00292834	2.17183
225378	1.07623e-21	5.59493							237310	0.00294446	2.16039
221726	1.0779e-21	6.25732							1564083	0.00295227	2.98135
234974	1.08055e-21	5.94002							1559650	0.00295434	3.92639
212427	1.09703e-21	6.72791							237232	0.0029591	3.24599
211724	1.10524e-21	6.42439							234105	0.00296047	3.45932
221987	1.11173e-21	4.96657							1556029	0.00296497	3.35594
217869	1.11652e-21	5.55618							219288	0.00298123	2.52161
224627	1.12646e-21	6.6489							1561199	0.00299082	2.74916
212761	1.12711e-21	6.54143							1559298	0.00300154	2.53408
201878	1.13293e-21	6.25148							233562	0.00303995	2.58752
217776	1.13444e-21	4.75104							241975	0.00308821	4.28914
201398	1.13676e-21	5.88622							206007	0.00309515	4.7027
200049	1.14464e-21	6.33447							242904	0.00309589	2.66314
229297	1.14706e-21	5.32763							233720	0.00310641	3.79932
218373	1.1482e-21	5.86214							220520	0.00311076	3.42756
212578	1.14916e-21	4.37033							1564263	0.00312114	3.55091
226648	1.1553e-21	5.96029							239568	0.0031246	2.89792
203292	1.16257e-21	5.77292							1556711	0.00312879	2.85891
225417	1.16335e-21	7.08152							227297	0.00313922	3.0886
218042	1.1726e-21	5.00537							238546	0.00314578	2.41522
204773	1.1944e-21	5.64224							204887	0.00316197	2.14873
221437	1.22626e-21	5.35722							206496	0.00316777	2.03181
221502	1.23836e-21	4.67594							1558262	0.00317272	2.6371
207467	1.27137e-21	5.17242							229005	0.00318172	2.38906
218133	1.27164e-21	6.19755							241122	0.00318222	3.01678
207243	1.27843e-21	4.11215							239553	0.00318469	3.35255
226958	1.27952e-21	6.0368							1569969	0.00319438	3.72424
207040	1.30836e-21	5.23365							241619	0.00319628	2.23721
208716	1.31023e-21	6.1856							224228	0.00320129	2.24272
223191	1.31057e-21	5.09351							228315	0.00320153	2.73498
203107	1.33123e-21	3.28074							210806	0.0032019	2.8557
50376	1.33921e-21	5.71961							209793	0.00320808	2.79899
236573	1.34169e-21	4.94927							223343	0.00320981	3.18558
223060	1.34666e-21	5.71166							1562283	0.00321287	2.28376
228755	1.36438e-21	5.52875							227949	0.00321664	2.82384
207643	1.39003e-21	5.62822							226582	0.00322436	2.20638
229417	1.39459e-21	6.11896							1554919	0.00322612	2.03504
202880	1.40584e-21	7.48261							213967	0.00323357	4.55332
202167	1.4615e-21	6.37746							1563907	0.00325568	2.02856
225006	1.46926e-21	6.22657							203242	0.0032558	2.28244
218389	1.49544e-21	6.10388							239062	0.00326155	2.49559
201405	1.52369e-21	6.11934							205794	0.00326749	2.08281
221504	1.55858e-21	6.01463							1562309	0.00327384	2.60338
217747	1.56091e-21	4.3991							1557832	0.00327693	6.06401
202734	1.58729e-21	5.49242							227180	0.0032809	3.60458
NaN	1.59071e-21	5.88307							241752	0.00328251	2.61222
231896	1.59913e-21	5.62111							201744	0.00330606	2.11535
218593	1.61125e-21	6.31229							1562879	0.00330785	2.59625
213152	1.64722e-21	5.86602							237285	0.00331222	2.79119
209623	1.65275e-21	6.43124							206140	0.00332616	2.06262
200792	1.65639e-21	5.6613							238751	0.00333082	5.08691
202420	1.68035e-21	6.3011							1556211	0.00333489	5.02444
212119	1.68477e-21	5.02489							243706	0.0033487	2.56232
212695	1.70123e-21	7.48232							1559992	0.00335219	3.6491
203090	1.7088e-21	7.18205							1553842	0.00335523	3.371
208959	1.71641e-21	5.8205							212233	0.00336415	2.52939
222672	1.72731e-21	5.21233							219935	0.00336534	2.65112
208822	1.73791e-21	6.21986							239336	0.0033684	2.68551
226004	1.76798e-21	6.43195							202350	0.00337576	3.7463
224505	1.77002e-21	5.58803							203915	0.00338317	3.56013
201190	1.77053e-21	6.10353							243132	0.00338846	2.62268
226188	1.80021e-21	5.95809							1559406	0.00340266	2.23039
211730	1.80991e-21	4.95045							243139	0.00341037	2.7103
222266	1.81525e-21	7.55389							1561101	0.00341477	2.0976
226066	1.85155e-21	6.39306							235746	0.00342182	2.90334
205944	1.88886e-21	6.86548							211424	0.00342502	2.03918
200652	1.91498e-21	5.86479							236645	0.0034257	2.00594
217769	1.94032e-21	4.39274							206726	0.00342682	2.38966
225772	1.96444e-21	6.10352							207575	0.00343286	2.43442
202105	1.96695e-21	5.77							1563044	0.0034348	2.36166
202283	1.99278e-21	3.95226							239775	0.00343979	2.03207
200622	2.01406e-21	5.62679							213861	0.00345322	2.17694
204571	2.05941e-21	6.79323							218035	0.00345674	2.6375
221515	2.08829e-21	6.092							240105	0.00345898	2.24666
219146	2.09087e-21	4.98216							204036	0.00346039	2.15399
224186	2.11057e-21	5.7418							210609	0.0034621	2.12905
200066	2.14476e-21	6.06832							1570064	0.00346785	2.63313
217898	2.18242e-21	5.47363							206142	0.00348392	2.86903
200608	2.19099e-21	6.39327							34471	0.00349634	5.9595
218632	2.203e-21	5.37839							232785	0.00350028	2.38875
221896	2.21165e-21	4.79426							242907	0.00351748	2.01548
213708	2.22199e-21	5.80268							1562509	0.00352725	2.3687
219106	2.2329e-21	3.10343							1562678	0.0035294	2.347
202602	2.2395e-21	5.87558							228124	0.00353012	2.18657
219485	2.36229e-21	5.43865							231260	0.00354575	3.45476
218534	2.38025e-21	5.08669							1566557	0.00355045	4.10329
218239	2.39087e-21	5.60262							237898	0.00355354	2.95242
202032	2.40568e-21	5.74387							220390	0.00355397	2.2836
222460	2.45128e-21	5.9336							216134	0.00356597	2.1284
209063	2.45628e-21	5.81842							206060	0.00357794	3.24762
201388	2.46009e-21	5.3209							210164	0.003581	2.26348
208091	2.47287e-21	5.49082							236302	0.00359861	2.88955
201588	2.47611e-21	4.50043							217744	0.00360511	2.52735
201623	2.48832e-21	5.95905							219691	0.00361828	2.28154
225272	2.54764e-21	5.64064							235643	0.00364739	2.67197
212112	2.58265e-21	6.01905							211740	0.0036606	2.50717
202245	2.5951e-21	6.21807							203474	0.00366848	2.11519
222516	2.61284e-21	5.97277							214159	0.00368741	2.94416
1553118	2.63389e-21	6.99183							237845	0.00370175	2.26048
202857	2.66849e-21	6.29509							220129	0.00370782	3.05409
213567	2.6695e-21	5.25137							225299	0.00371522	2.11263
221021	2.68915e-21	6.95279							216379	0.00371772	2.18427
204612	2.71558e-21	4.21985							1554147	0.00376311	2.68687
230438	2.73017e-21	6.89459							215311	0.00378615	3.00568
223671	2.78661e-21	5.38261							240370	0.00379251	2.40236
213976	2.79576e-21	6.35632							203967	0.00380342	2.05588
200853	2.85425e-21	5.62002							235956	0.00381325	2.62502
212648	2.90245e-21	6.42041							1563226	0.00382291	2.01057
216326	2.92126e-21	6.13219							1558666	0.00384736	2.32317
200711	2.95149e-21	5.44491							1569540	0.00386086	2.73327
219816	3.01473e-21	6.63478							1561200	0.00386569	4.25409
229544	3.01671e-21	6.39661							228767	0.00386957	2.85491
207071	3.05295e-21	5.37368							220037	0.00386995	2.39647
200725	3.11089e-21	3.46259							205907	0.00387933	3.21324
202560	3.11368e-21	6.27359							206715	0.00388393	4.58249
226391	3.11651e-21	5.71263							1560853	0.00388394	2.14638
207525	3.15283e-21	6.71889							205111	0.00389901	2.12576
223003	3.16284e-21	5.57072							223059	0.00392703	2.76367
224573	3.16504e-21	5.31516							231034	0.00393625	2.67738
208152	3.17037e-21	4.97809							1559034	0.00394054	2.18386
223336	3.20354e-21	5.23682							243932	0.00395321	3.86509
202306	3.2044e-21	5.98573							229207	0.00396499	2.0295
203608	3.25029e-21	6.15002							214914	0.00397929	2.69072
212461	3.26289e-21	6.03726							214511	0.00398846	2.14902
224366	3.28158e-21	5.68777							1561367	0.00399013	2.41796
219242	3.34718e-21	5.44922							205029	0.00399761	7.78031
55616	3.4162e-21	5.29076							203180	0.00399852	2.4751
202087	3.46261e-21	5.36266							1556578	0.00400457	2.29692
208991	3.51101e-21	6.34328							229487	0.00401625	2.43723
201379	3.54135e-21	6.93907							1568820	0.00401699	2.97007
203531	3.54532e-21	5.55163							244110	0.00401931	2.28859
218165	3.55392e-21	5.73476							234776	0.00403616	2.17449
218070	3.65274e-21	5.41366							1559542	0.00404505	2.54879
205741	3.65986e-21	6.20614							1562597	0.00404588	2.38088
213852	3.7279e-21	5.86573							231828	0.00405006	2.77016
202518	3.73975e-21	5.90106							222877	0.00406046	3.33814
218216	3.79669e-21	6.8103							225639	0.00407811	2.99997
213097	3.79901e-21	5.48851							223859	0.00408174	4.14661
226768	3.84304e-21	6.79191							237891	0.00409863	3.08344
226131	3.90774e-21	2.76179							225424	0.00410877	2.04361
224707	3.95947e-21	4.48937							229339	0.00410965	3.35151
228039	4.09176e-21	5.57398							241177	0.00414119	3.5864
201665	4.09673e-21	3.92465							236662	0.00414285	2.67858
222716	4.16846e-21	5.83051							205020	0.00415446	2.31325
218929	4.19035e-21	5.2849							209875	0.0041567	4.75254
203576	4.19594e-21	6.51407							47560	0.00419609	2.22257
225298	4.2063e-21	5.62546							214528	0.00420093	2.2208
222488	4.23349e-21	6.29073							205399	0.00420219	2.41611
212351	4.23612e-21	6.02966							215133	0.00420675	3.29306
211152	4.23749e-21	5.84529							1563845	0.00420893	2.97366
218204	4.2429e-21	5.27496							243864	0.00421166	2.43001
217918	4.2839e-21	5.35244							217138	0.00422368	2.56888
202303	4.33821e-21	6.27243							226213	0.0042327	2.40245
235451	4.38308e-21	7.05162							229724	0.00426644	2.00134
203465	4.3928e-21	6.44596							232356	0.00428494	2.12957
214271	4.64091e-21	4.21934							217525	0.00429425	2.06277
227878	4.64357e-21	6.02533							242762	0.00432596	2.7377
233595	4.65366e-21	6.70123							229497	0.00433312	2.89398
222448	4.71957e-21	6.06264							219355	0.00433646	2.90263
205012	4.74667e-21	6.0371							239244	0.00434966	3.21966
207974	4.75187e-21	5.07096							241942	0.00436646	7.02888
215596	4.75552e-21	5.98593							222108	0.00437083	4.45004
210759	4.77134e-21	4.71588							214533	0.00437236	2.13802
220924	4.85072e-21	5.13527							238984	0.00437993	2.33583
215023	4.87943e-21	5.88782							238316	0.00439607	2.18511
207805	4.89762e-21	5.43607							239326	0.00439873	2.1802
212403	4.91108e-21	6.47039							1565765	0.00441855	2.27247
226864	4.91436e-21	3.74526							216386	0.00442481	2.34006
209445	4.96006e-21	5.19397							237828	0.00445047	2.4646
208773	4.9912e-21	6.0224							229669	0.0044577	2.3273
203449	5.00944e-21	5.35967							215659	0.0044858	2.46559
204219	5.02957e-21	5.00038							1562850	0.00452472	2.30136
225049	5.02965e-21	4.53447							208607	0.00453355	3.85819
223277	5.05834e-21	4.61881							244762	0.00453761	2.43345
218558	5.07534e-21	5.63298							232812	0.00453846	2.8862
225398	5.10787e-21	6.31228							221555	0.00453995	2.28172
214083	5.20066e-21	6.50897							230360	0.00455411	3.64903
221501	5.33317e-21	5.36592							233129	0.0045544	2.16981
202228	5.34548e-21	5.4853							241819	0.00455459	2.3065
202738	5.43469e-21	4.67256							234020	0.00455698	3.2771
224887	5.44483e-21	6.32192							233247	0.00457748	2.13524
218386	5.5409e-21	5.31431							204486	0.00457799	2.1929
203520	5.63589e-21	4.99853							210997	0.00458181	2.07126
1555971	5.63697e-21	5.91654							1564072	0.00460691	2.78971
235261	5.67158e-21	4.95457							225008	0.00461206	2.76246
223267	5.7398e-21	5.73368							1562996	0.0046193	2.45185
210502	5.81568e-21	6.50901							235432	0.00462457	2.11433
225926	5.8171e-21	5.21908							231235	0.00462867	2.12617
234753	5.87608e-21	5.31029							1553911	0.00463068	2.62386
208643	5.90543e-21	6.63733							217518	0.00463761	2.11981
221505	5.90954e-21	6.58514							216628	0.00463948	2.79931
217720	5.96829e-21	4.09698							220437	0.00464652	3.52617
220036	5.97122e-21	5.80145							228503	0.00465123	3.00389
224592	5.99723e-21	5.44409							238009	0.00466004	2.26975
212781	6.0241e-21	6.04832							240247	0.00467462	2.35878
208843	6.0758e-21	6.18322							228672	0.00467885	2.07238
213491	6.0794e-21	5.6007							217528	0.00468004	2.6647
201483	6.13748e-21	5.94837							227629	0.0046855	2.35694
203155	6.17015e-21	5.68506							236659	0.0046921	2.58173
202538	6.18462e-21	5.61739							1553560	0.00470287	2.32144
219527	6.21651e-21	5.2028							216966	0.00470494	2.38421
218163	6.21816e-21	4.69241							1569675	0.0047083	2.50597
203249	6.22514e-21	6.14032							238221	0.00471035	2.41443
223110	6.2593e-21	7.03489							240625	0.00471331	2.57237
206854	6.27772e-21	5.84404							204894	0.00472018	2.39265
225032	6.39589e-21	6.37517							204438	0.0047258	2.98095
222388	6.42144e-21	5.70845							1560861	0.0047383	2.12951
212219	6.43208e-21	5.16731							240382	0.00474298	2.06416
221850	6.44493e-21	5.93158							233690	0.00474532	2.85107
206057	6.4546e-21	5.89405							234101	0.00474664	2.2759
225102	6.60187e-21	5.66559							208575	0.00474708	2.3913
201805	6.68552e-21	5.35348							244257	0.00475376	2.14862
219646	6.6887e-21	5.61369							244720	0.00477462	3.50376
211068	6.7108e-21	5.52759							205499	0.00478409	2.49973
225197	6.73164e-21	5.56692							223934	0.0048073	2.17556
225733	6.80208e-21	5.26212							215305	0.00483536	2.03277
200052	6.81649e-21	6.2001							1558682	0.00483586	2.32758
222518	6.82116e-21	6.53992							200831	0.0048449	3.4376
201682	6.88248e-21	5.43662							1555728	0.00484516	3.87756
224716	6.92262e-21	6.16682							206392	0.00489634	2.03133
203427	7.04827e-21	6.49743							1555356	0.00490113	2.42411
200630	7.04834e-21	4.98114							203680	0.00490563	3.02651
35254	7.04921e-21	5.75358							225834	0.00493239	3.30657
208980	7.0536e-21	2.95951							1557810	0.00494439	2.05856
200797	7.05759e-21	5.39983							216899	0.00494948	2.37942
44669	7.08128e-21	5.19002							205158	0.00495218	2.32471
201101	7.11838e-21	5.99544							229461	0.00496413	3.16543
212080	7.17499e-21	7.20813							234223	0.00497948	2.18627
212269	7.22e-21	6.33478							209138	0.00500943	3.19077
200860	7.2204e-21	6.42571							205406	0.00501521	2.10977
214257	7.29012e-21	6.26812							214026	0.00501725	2.12736
225058	7.30667e-21	4.8327							219179	0.00502304	3.4112
203662	7.32417e-21	5.36879							204052	0.00502535	2.17879
228379	7.3658e-21	7.82559							1560661	0.00503745	2.12251
209065	7.37115e-21	5.13838							234059	0.00505917	2.76828
202039	7.38461e-21	4.92696							1566441	0.00506379	3.3188
201255	7.42985e-21	5.82378							231556	0.00507773	2.09262
221532	7.60597e-21	5.53742							215352	0.00509248	2.3945
207559	7.85991e-21	6.03238							231747	0.00509467	2.67042
200907	7.89516e-21	6.11214							205249	0.00509778	3.14897
202243	7.94343e-21	5.34226							1559655	0.00510509	2.17541
202505	7.96712e-21	6.01281							225688	0.00511014	2.34064
209005	8.02857e-21	5.6871							234628	0.00511732	2.51972
231552	8.14789e-21	6.85209							201952	0.00512436	2.48504
227546	8.17688e-21	5.46781							201843	0.00512545	6.42122
218946	8.17877e-21	5.56319							205899	0.00512952	2.8399
200614	8.24689e-21	5.21786							237114	0.00513239	3.09738
226073	8.31794e-21	5.84813							213994	0.00513625	4.29824
204589	8.3806e-21	6.03603							229084	0.0051513	2.82533
222732	8.42526e-21	5.62936							1560698	0.00516076	3.17842
223044	8.52636e-21	5.0279							235952	0.00516518	2.39859
206959	8.55308e-21	5.67483							227290	0.00516987	2.00266
200958	8.58574e-21	5.46953							243546	0.00517282	2.40192
223008	8.6637e-21	6.16245							1559022	0.00518935	3.61855
226524	8.69523e-21	5.25462							242519	0.00520686	2.64287
223097	8.70082e-21	6.1519							235965	0.00522516	2.02554
1553570	8.7087e-21	2.19872							237428	0.00522887	2.92414
209507	8.71115e-21	5.9005							1558964	0.0052376	2.56901
200016	8.75778e-21	4.32814							231442	0.00524744	2.09368
208248	8.79982e-21	6.59356							243672	0.00526277	2.67809
228775	8.84608e-21	5.47544							232414	0.00529444	2.32258
202249	8.85027e-21	5.56881							237466	0.00535167	2.12556
228794	8.87887e-21	3.27222							215388	0.00535272	2.03897
224671	8.89211e-21	5.58312							212354	0.00537381	2.23502
200932	8.89416e-21	5.26121							244172	0.00539257	2.0263
202515	9.01692e-21	6.84595							234678	0.00539354	2.57734
223560	9.06396e-21	5.2552							220467	0.00539563	2.14614
222514	9.19294e-21	5.83013							223058	0.00540185	2.21926
225674	9.19376e-21	6.15077							225406	0.00541406	2.14458
202153	9.19584e-21	5.91984							213056	0.00542466	2.51593
223022	9.2377e-21	6.15341							1552875	0.00544762	2.70125
218357	9.26626e-21	4.32266							1562839	0.00545793	2.7367
218527	9.30049e-21	5.58459							237756	0.00546455	2.24727
212222	9.3133e-21	5.41059							205419	0.00546507	2.78618
212325	9.37171e-21	5.45039							208792	0.00546804	2.56331
223017	9.49015e-21	5.29742							204013	0.00547388	2.36208
217910	9.69858e-21	5.71491							1559706	0.00548349	2.59853
222997	9.7083e-21	6.22526							1566726	0.00549447	2.48692
224812	9.72188e-21	4.9972							1563414	0.0055003	5.00579
213762	9.72873e-21	6.09369							1557659	0.00550078	2.75971
220964	9.75556e-21	5.93955							211355	0.00550281	2.50099
212375	9.77909e-21	6.54404							219338	0.00552265	2.18774
232983	9.79362e-21	5.1861							233947	0.00552406	2.33727
211600	9.86195e-21	2.87868							228554	0.00553331	2.22027
209482	9.93124e-21	5.89554							205500	0.00557895	3.69846
200676	9.95838e-21	5.97407							240747	0.00558104	2.33631
202713	9.98359e-21	5.82198							236313	0.00559558	9.53365
218203	9.98377e-21	5.28339							223620	0.0056108	2.9252
218348	9.98907e-21	6.76227							244286	0.00562487	3.91742
219940	9.99653e-21	6.5752							1564299	0.00565204	2.5759
202839	1.00742e-20	6.20467							206199	0.00565713	2.11324
201975	1.00856e-20	4.84198							1566836	0.00565803	2.01767
221780	1.01958e-20	6.87782							241492	0.00566109	2.8627
224857	1.0232e-20	5.43527							244321	0.00568065	2.12692
212652	1.03959e-20	5.998							1558680	0.00568634	2.30031
227264	1.05198e-20	6.52345							203108	0.0056872	2.49704
217766	1.05334e-20	5.59073							1565934	0.00569826	2.59665
202276	1.05804e-20	5.45587							242250	0.00569844	3.65776
209785	1.06055e-20	5.55939							1570131	0.00569915	2.23497
228822	1.06396e-20	5.86218							234017	0.00571132	2.3454
214263	1.07135e-20	5.66563							233901	0.00575711	2.64913
219431	1.07362e-20	6.24463							217513	0.00576431	2.21185
223104	1.07698e-20	5.37847							224560	0.00576474	2.03668
218091	1.11342e-20	6.07244							204787	0.00577002	2.00139
209740	1.11584e-20	5.77358							214563	0.00578659	2.38627
218031	1.12679e-20	6.10352							1552632	0.00578754	2.54805
238719	1.13026e-20	7.14445							215331	0.00581301	2.22293
228220	1.14362e-20	6.24577							230520	0.00582095	2.66798
1560587	1.14371e-20	5.58987							220270	0.00584084	2.26401
227792	1.15063e-20	5.70552							208337	0.00586223	2.20114
203714	1.18661e-20	6.57924							1569518	0.00587019	2.13195
215096	1.18757e-20	5.34116							1569668	0.00587027	2.05331
227357	1.19163e-20	5.70771							230753	0.00588498	2.66764
218772	1.20079e-20	6.13165							239273	0.00588687	2.40131
200680	1.20947e-20	4.82312							239571	0.00589252	2.18211
205930	1.20951e-20	5.38313							1561923	0.00589345	2.24767
232347	1.22091e-20	5.83196							242191	0.00593073	2.17263
225154	1.23301e-20	5.78867							205908	0.00593671	3.75587
200029	1.25072e-20	3.85937							1566158	0.00594172	2.50629
218852	1.26657e-20	5.82337							1557116	0.00594503	3.63046
224603	1.26756e-20	4.57018							1563316	0.00594844	2.39877
208989	1.26932e-20	6.54224							228771	0.00596338	2.47769
201080	1.2699e-20	6.04644							1570597	0.00596699	2.10952
202550	1.26991e-20	5.01998							213895	0.00597363	3.32663
229319	1.27418e-20	7.70203							223976	0.005978	2.27173
225218	1.28197e-20	6.2562							1557617	0.00601809	3.03435
1554868	1.28446e-20	5.99342							211602	0.00603654	2.33853
218194	1.28867e-20	4.81484							235564	0.00604075	5.07208
201173	1.29776e-20	6.02815							238480	0.00604791	3.55515
225048	1.30479e-20	6.20165							212353	0.00605223	2.82124
200817	1.3187e-20	3.46176							228431	0.00606236	2.35996
226577	1.32815e-20	5.67715							243986	0.00607878	2.29352
228517	1.33168e-20	6.80138							232453	0.00608683	3.05348
212600	1.33368e-20	4.15315							1561263	0.00609534	2.48117
221598	1.33608e-20	5.47654							204035	0.00610478	2.15426
202777	1.33777e-20	6.33841							210194	0.00611797	2.7671
223187	1.33964e-20	5.5624							232384	0.00613709	3.15646
204690	1.34447e-20	5.98169							241611	0.00614248	2.31935
212496	1.34589e-20	5.65589							236538	0.00614914	3.61805
211989	1.35122e-20	7.07131							207552	0.00616769	2.11357
229854	1.3661e-20	5.50918							1560238	0.00617556	2.53583
212185	1.36656e-20	6.25566							238274	0.00617661	2.32883
210588	1.37345e-20	7.4944							206717	0.0061788	3.01167
1555864	1.37447e-20	4.6609							1557036	0.00618254	2.14418
227538	1.37946e-20	7.96732							1555962	0.00619349	2.48211
201519	1.38066e-20	5.38718							1560982	0.00620116	2.23127
213911	1.38174e-20	5.21156							1569225	0.00620376	2.48947
223053	1.38938e-20	6.00026							228218	0.00621018	2.07821
229235	1.3904e-20	5.69535							239181	0.0062123	2.33032
224513	1.40211e-20	6.83489							1557352	0.00621734	2.52672
201486	1.40443e-20	5.06912							239468	0.00624788	4.23182
226161	1.40675e-20	5.45949							223062	0.00625991	3.11868
200593	1.41517e-20	7.10116							243714	0.0062935	2.1067
225126	1.4496e-20	5.02827							1554242	0.0063298	2.92371
223067	1.46821e-20	5.39703							217271	0.00633776	2.48863
210028	1.46937e-20	6.11492							211712	0.00633815	2.01112
213336	1.47328e-20	6.44671							1566892	0.00634107	2.58678
220261	1.47463e-20	5.6138							209292	0.00635027	8.8772
222047	1.47719e-20	6.57639							1552852	0.0063623	2.06661
226749	1.48199e-20	5.68699							1565863	0.00636874	2.42882
223983	1.49289e-20	5.09341							1569979	0.00641418	2.69426
203709	1.51011e-20	6.10324							205885	0.00642927	3.27596
203666	1.51604e-20	6.17145							219825	0.00643092	2.13202
209132	1.51865e-20	5.8644							237292	0.00643214	2.55896
229573	1.53459e-20	5.98286							209291	0.00644494	4.16027
227251	1.53711e-20	5.97415							204309	0.006458	2.21583
223712	1.53758e-20	6.87923							1560715	0.00650374	2.4858
226801	1.56079e-20	5.98005							241694	0.00650978	2.30387
201153	1.56428e-20	5.02304							1552839	0.00651187	2.11271
200751	1.5691e-20	6.2566							214650	0.00651402	2.37724
225394	1.5707e-20	5.45482							235141	0.00652162	2.15314
201176	1.59122e-20	6.99552							224123	0.00653648	2.01979
223705	1.6128e-20	6.29342							244042	0.00654411	2.59075
201825	1.62155e-20	6.12632							229354	0.00656497	3.41218
219939	1.6269e-20	3.84995							1554062	0.00657029	2.92567
232215	1.62819e-20	6.62034							1565784	0.00657515	2.09419
226202	1.62908e-20	5.98118							1552457	0.00658268	2.42643
201807	1.63072e-20	5.79411							243792	0.00658545	4.35784
224675	1.65891e-20	6.48485							1556039	0.00660863	2.02166
213360	1.66474e-20	6.06239							209505	0.00663192	4.03669
228970	1.68385e-20	5.4185							210571	0.00664078	2.62321
222408	1.68562e-20	6.8874							219738	0.006646	3.90839
212535	1.68718e-20	5.29754							218585	0.00665268	2.11827
201157	1.69049e-20	6.02719							1553622	0.00667743	3.34797
226224	1.69824e-20	6.36482							1554960	0.00669833	2.21751
202521	1.70605e-20	6.85289							224020	0.00671098	2.12345
225781	1.75765e-20	6.823							1562475	0.00671523	2.23153
219819	1.76619e-20	4.76436							1562720	0.0067203	2.03918
202985	1.77327e-20	6.6375							234640	0.00674022	2.60537
219547	1.8054e-20	5.28751							209614	0.00674888	2.43473
229766	1.81232e-20	6.02732							228081	0.00675856	2.47678
208862	1.81384e-20	5.17972							241648	0.00676226	2.65127
207585	1.82857e-20	6.03295							232686	0.0067776	2.37967
209001	1.83217e-20	5.34156							226281	0.00678921	4.53534
224160	1.8386e-20	5.79379							215634	0.00679188	4.18408
213883	1.83862e-20	5.29352							233910	0.00679252	2.38503
213404	1.84063e-20	6.05057							228919	0.00680118	2.07281
36888	1.85631e-20	4.77853							227646	0.00680384	2.82129
217722	1.8569e-20	4.01717							235299	0.00680515	4.43407
202919	1.85824e-20	5.79384							204471	0.00681337	3.36685
226842	1.87064e-20	7.76533							1557417	0.00681908	2.4251
209549	1.87651e-20	5.73161							228886	0.00682137	2.01321
223345	1.8829e-20	5.61623							204602	0.00682603	2.51336
218283	1.9134e-20	6.27128							1559462	0.00683438	4.0868
200773	1.93176e-20	5.80891							1566284	0.00684829	2.18083
213227	1.93622e-20	5.42601							221879	0.00685796	2.73311
219007	1.95467e-20	6.20311							1559067	0.00685863	2.3931
222982	1.9559e-20	4.84039							243846	0.00686342	3.36888
202271	1.9627e-20	5.99567							241906	0.00687454	2.17734
37232	1.97221e-20	4.81587							203148	0.00688404	2.40667
213203	1.97756e-20	5.307							226545	0.0068995	2.20013
208742	2.03347e-20	4.9126							240580	0.00690546	2.24155
208710	2.05211e-20	6.20621							207242	0.00690879	2.11449
226567	2.06251e-20	5.60121							205680	0.00691169	2.24922
204064	2.07312e-20	6.57034							1559668	0.00691812	2.04549
239917	2.07888e-20	6.56989							244760	0.00692198	3.74516
201200	2.09321e-20	6.13145							1554789	0.00695816	2.85312
201098	2.11438e-20	5.25433							1554007	0.00696008	3.89069
225317	2.1214e-20	5.09779							242009	0.00697331	2.6111
218375	2.12714e-20	5.40177							242930	0.00697534	2.07313
1554239	2.16345e-20	6.11964							1563112	0.0069827	2.21791
223166	2.16558e-20	6.3548							1558552	0.00699547	3.01885
212718	2.18309e-20	6.35215							205081	0.00699828	2.09686
214661	2.19623e-20	5.90285							231369	0.00700465	2.18425
209102	2.19683e-20	6.37728							236300	0.00700596	3.64221
203481	2.20013e-20	6.66466							233778	0.00701722	2.37454
223342	2.20051e-20	5.74989							222341	0.00702467	2.23448
227305	2.22104e-20	6.63126							223837	0.00703986	2.49731
209311	2.22405e-20	5.28909							212874	0.00704463	2.106
201472	2.22712e-20	4.99227							227566	0.00706085	4.13751
218889	2.27274e-20	6.3927							1559932	0.00708752	2.23581
210453	2.28748e-20	4.46541							1553243	0.00708866	2.17809
214113	2.29539e-20	6.42133							204268	0.00709729	2.56236
218449	2.29869e-20	5.96047							215828	0.00709807	2.02017
201240	2.30034e-20	5.94689							1554258	0.0071066	3.42493
209476	2.31781e-20	5.59828							208213	0.0071139	2.24413
201303	2.334e-20	6.55976							205440	0.0071159	12.1048
202900	2.36251e-20	5.68531							204361	0.00713328	4.89599
201199	2.36777e-20	5.02997							1560352	0.00713988	2.23053
223090	2.40552e-20	5.30934							230521	0.00714311	2.11341
228024	2.41565e-20	6.55204							1562902	0.0071475	3.13316
202408	2.41594e-20	5.68157							202435	0.0071511	2.10762
203376	2.4244e-20	5.95205							206757	0.00716578	3.1644
219988	2.43706e-20	5.95448							233025	0.00716926	2.36398
218936	2.4628e-20	6.02348							231979	0.0072156	2.25456
228766	2.46754e-20	5.75995							207030	0.0072176	2.77612
222203	2.46772e-20	6.45718							234170	0.00722187	2.24473
200675	2.47291e-20	5.39361							1556773	0.00722261	2.55985
202073	2.48439e-20	5.94714							232380	0.00724125	3.68619
218069	2.49509e-20	6.63154							1566656	0.00726003	2.29
209130	2.54346e-20	6.16645							206102	0.00727539	3.45536
222533	2.55544e-20	5.65324							200953	0.00727542	2.70928
203632	2.57484e-20	6.53303							233109	0.00728194	2.35308
229606	2.58374e-20	5.10322							228450	0.00728623	2.30198
215548	2.66086e-20	5.53047							211131	0.00729516	3.6746
227532	2.67136e-20	4.75048							202207	0.00729682	2.15747
212712	2.69324e-20	5.66004							219461	0.00731179	2.00985
203863	2.69793e-20	4.28345							210145	0.00731247	4.94396
233315	2.71778e-20	5.33658							240158	0.00731796	2.98923
201731	2.72596e-20	5.99648							210355	0.00732892	3.38277
218127	2.73244e-20	6.1712							229288	0.0073477	4.18129
204497	2.80838e-20	6.28881							1552763	0.00735089	2.82136
205928	2.82013e-20	6.24046							210953	0.00735516	2.08439
226860	2.83136e-20	5.58383							230601	0.00738087	2.30211
236248	2.84509e-20	6.40703							235408	0.00739032	6.63902
212178	2.84792e-20	5.91476							221714	0.00740215	2.2632
204511	2.8481e-20	5.7676							220814	0.00742529	2.35811
224883	2.86733e-20	5.8036							225603	0.00743177	2.67879
214394	2.88745e-20	4.42782							235362	0.00743879	3.25568
225679	2.91818e-20	6.25879							240327	0.00745315	2.45293
224524	2.92043e-20	5.0897							237216	0.00746311	2.17667
209301	2.92634e-20	5.23814							242827	0.00746919	2.3228
225030	2.93035e-20	6.4717							240448	0.00748646	2.5173
204491	2.93977e-20	5.90588							203798	0.0075025	3.14575
201415	2.95341e-20	6.41925							216284	0.00750943	2.09284
224130	2.95349e-20	5.56829							232878	0.00755642	2.70301
212140	2.957e-20	6.98509							241816	0.00760037	2.60657
228962	2.99607e-20	5.57359							208791	0.00760469	2.21471
202785	3.00357e-20	6.12425							242436	0.00761139	2.77781
210296	3.01525e-20	5.43657							234330	0.0076596	4.15156
221847	3.02161e-20	5.08354							233139	0.00766937	2.07517
225210	3.03844e-20	6.5226							211732	0.00770005	2.32356
212124	3.07552e-20	5.35205							231003	0.00770066	2.32523
200897	3.18926e-20	5.24716							240665	0.00771302	2.27258
218379	3.23595e-20	5.56371							243265	0.00772825	2.54814
202649	3.23942e-20	4.59733							222355	0.00774088	2.21559
221050	3.24893e-20	4.90684							207417	0.00779685	3.64762
217846	3.26227e-20	4.66081							1554098	0.00781585	2.24176
213317	3.26629e-20	4.13134							240475	0.00782585	2.32453
202172	3.34519e-20	6.39519							1562527	0.00783176	2.78376
231825	3.36285e-20	6.43124							228243	0.00784655	2.28513
203113	3.36878e-20	5.2805							206518	0.00784749	2.18013
228785	3.39249e-20	6.6202							233792	0.00785089	2.83975
201252	3.39721e-20	5.78631							213683	0.00785933	2.08745
211382	3.40024e-20	6.23657							225842	0.00786177	2.41863
223305	3.4171e-20	5.68142							232939	0.00788105	2.60636
233775	3.41775e-20	7.26944							213992	0.00788129	3.40246
212571	3.43469e-20	6.02259							230351	0.00788458	2.48938
224871	3.45297e-20	6.41173							1569171	0.00789152	2.65133
217803	3.45498e-20	5.31553							222358	0.00789969	2.19735
200846	3.45924e-20	5.1327							210631	0.00790311	2.78584
218132	3.5139e-20	5.08453							1553711	0.0079061	2.09855
218208	3.51462e-20	5.81846							1555989	0.00791257	2.01985
224481	3.51541e-20	4.78239							205943	0.00791836	2.80198
206015	3.52073e-20	6.2447							234697	0.00793429	2.08615
216486	3.54666e-20	5.938							204070	0.00794988	2.31627
208739	3.58225e-20	5.96486							205242	0.00798886	3.20974
214097	3.58708e-20	5.20032							229477	0.00800076	2.92767
226437	3.58953e-20	5.38365							243287	0.00800713	2.13103
238896	3.59097e-20	5.51789							1552818	0.00801067	2.07361
217942	3.59532e-20	5.89846							238097	0.00809056	2.28359
221427	3.63174e-20	6.45048							242601	0.00809313	2.49376
211733	3.63343e-20	5.28362							240081	0.00810036	2.6474
226195	3.64879e-20	5.58077							242078	0.00810311	2.12063
200057	3.66658e-20	5.63831							244651	0.00813323	2.40121
221509	3.68086e-20	6.469							1559988	0.00815736	2.81681
200684	3.69591e-20	6.2304							1557791	0.00816044	2.09697
206981	3.73788e-20	5.14529							205625	0.00816807	2.50781
1555961	3.75192e-20	4.49319							1568617	0.0081755	2.09036
217882	3.75647e-20	5.02762							216440	0.00819144	2.34654
226295	3.76057e-20	5.49939							1563032	0.00819585	2.62854
201922	3.76424e-20	5.16527							211151	0.00822953	2.02482
222103	3.77839e-20	6.48962							1559144	0.00823547	2.09707
56256	3.82692e-20	6.37955							223783	0.0082513	2.33014
222148	3.8535e-20	5.67807							1553031	0.00825175	2.32388
221804	3.90114e-20	6.18344							207264	0.0082572	2.00345
218441	3.90134e-20	6.3606							233273	0.00826031	2.03094
218450	3.90601e-20	6.4403							1557063	0.00827335	3.42181
218505	3.9167e-20	5.93979							206661	0.00829347	2.69841
212502	3.9242e-20	5.47625							211020	0.00831273	2.88144
208708	3.94474e-20	5.49314							219659	0.0083152	2.35433
223253	3.95369e-20	4.05551							218451	0.00834604	2.31458
224669	3.96236e-20	6.28109							233675	0.00834634	2.7409
205878	3.98451e-20	5.49924							209496	0.00834809	2.40534
1555844	4.05068e-20	6.45676							243723	0.00835057	2.93785
200099	4.05909e-20	3.05512							202988	0.00837718	2.66639
227892	4.06038e-20	6.39628							1561687	0.00838536	3.23523
225697	4.08969e-20	5.66138							213238	0.00838561	2.10559
208676	4.09548e-20	5.45314							232166	0.00838747	3.39598
215089	4.09934e-20	6.02676							210198	0.00841991	3.64039
223041	4.10506e-20	6.64675							220276	0.00843186	3.93417
202681	4.11008e-20	5.91249							232968	0.00843828	2.16263
225466	4.14151e-20	5.75305							217319	0.00844556	2.2189
201092	4.14543e-20	5.67838							201062	0.00846959	2.40603
211509	4.18015e-20	3.37779							243000	0.00849519	2.45599
218087	4.18351e-20	5.48857							213067	0.00849966	2.28638
201054	4.19123e-20	6.31271							241873	0.0085121	3.0429
212795	4.23387e-20	5.94707							242241	0.00852737	2.61314
218578	4.23726e-20	5.28746							233269	0.00856198	3.27026
212155	4.25632e-20	5.66556							240058	0.00860641	2.31031
209240	4.29692e-20	6.04394							231001	0.00862898	2.71417
211566	4.29768e-20	5.4148							243602	0.00869541	2.14826
221743	4.31631e-20	5.75571							1569680	0.00872705	2.36209
225522	4.31845e-20	6.21033							1567277	0.00872946	2.34707
216153	4.36992e-20	6.08815							220325	0.00873531	2.48791
201004	4.38164e-20	5.72958							218623	0.00873843	4.2685
200903	4.39945e-20	6.32702							228462	0.00876092	2.59595
212507	4.43152e-20	6.71376							1553917	0.00878358	2.2426
202176	4.45786e-20	5.45355							225617	0.00878638	2.392
202610	4.4623e-20	5.75002							220177	0.00879432	3.41166
212332	4.46653e-20	7.42002							225520	0.00881814	2.99598
213147	4.47633e-20	5.78738							215629	0.00882499	3.61019
207668	4.4878e-20	6.46886							1557961	0.00887883	3.0896
224621	4.54816e-20	5.94538							240727	0.00888649	2.35805
227837	4.56627e-20	5.23764							216087	0.00889186	2.10373
203527	4.57259e-20	5.20458							1569374	0.00891821	2.07062
223442	4.59986e-20	4.8116							1565900	0.00892373	3.09495
211594	4.60624e-20	6.73342							239777	0.00892738	2.05724
202144	4.62264e-20	5.23243							244635	0.0089288	2.72441
201414	4.62931e-20	6.03503							234553	0.00893809	2.21215
213704	4.68734e-20	4.53125							215874	0.00895397	2.20515
32069	4.70711e-20	5.07243							227909	0.00897403	2.38257
204957	4.71445e-20	5.43332							239587	0.00897811	4.04924
208772	4.75439e-20	6.26963							239834	0.00898677	2.10836
222994	4.77088e-20	5.63029							242507	0.00901258	2.12492
244839	4.81618e-20	4.3307							220868	0.00903273	2.52468
200058	4.85076e-20	5.981							240888	0.00903999	2.66151
208847	4.86635e-20	5.39232							225915	0.00906346	2.41415
218886	4.87938e-20	6.44292							1561003	0.00909362	2.33075
213117	4.88914e-20	5.34698							230163	0.00909977	2.12297
220547	4.91791e-20	5.78478							237830	0.00913464	3.14066
202909	4.9297e-20	6.40134							243352	0.00914006	2.55143
224196	4.94903e-20	5.36276							208712	0.00915778	2.27017
225995	4.96288e-20	5.72646							217098	0.00917332	2.24715
202159	4.96545e-20	5.43212							240186	0.0091758	3.06982
223389	4.97286e-20	5.02744							225806	0.00918007	4.05412
201570	5.00164e-20	5.17637							218369	0.00918918	2.34424
213956	5.07151e-20	7.27285							242063	0.00920057	2.95894
212007	5.12329e-20	5.87615							220858	0.00921557	4.14047
200867	5.16166e-20	7.46827							201896	0.00921746	2.7265
226467	5.18932e-20	6.17147							1558496	0.00923965	2.92546
221559	5.1939e-20	5.81786							229404	0.00925188	2.98665
213052	5.19969e-20	5.41079							1561431	0.00925842	2.47058
218463	5.20279e-20	5.39567							227862	0.0092909	2.05318
207618	5.20745e-20	5.69791							207142	0.00929813	4.95281
226090	5.22075e-20	6.14025							223814	0.00930594	2.22227
212261	5.22422e-20	5.58347							1563272	0.00930747	2.18586
203112	5.39746e-20	5.93596							234202	0.00930837	2.11559
223212	5.41714e-20	5.31871							1556200	0.00931354	2.41164
217793	5.46649e-20	6.04476							234129	0.00935037	2.06406
225121	5.47044e-20	6.45279							236383	0.0093612	2.78868
217841	5.48174e-20	6.03556							239010	0.00937352	4.27747
223151	5.48881e-20	4.94548							1564855	0.00938662	2.3025
212636	5.51801e-20	5.79096							209087	0.00938779	2.20453
216505	5.52422e-20	6.56528							241913	0.00945945	2.38511
203966	5.5367e-20	5.33259							242344	0.00949253	5.48929
214649	5.55817e-20	4.73712							235292	0.00953207	3.98135
220647	5.56447e-20	5.57473							235291	0.00954707	2.91698
208827	5.61421e-20	5.17464							1556402	0.00956664	2.24182
202905	5.63945e-20	7.35988							1556235	0.0095769	3.21031
222146	5.64923e-20	5.56287							1563370	0.00962523	2.11795
203469	5.65357e-20	5.357							236843	0.00964626	3.06303
225456	5.65874e-20	5.55179							232881	0.0096508	2.3531
209695	5.66445e-20	6.73287							233007	0.009656	2.5129
201144	5.66802e-20	5.86758							220670	0.00966493	2.66648
212296	5.69817e-20	4.61672							224165	0.00968177	2.24364
214281	5.70745e-20	5.53983							204338	0.00968832	2.05933
218250	5.7148e-20	5.89208							238502	0.00968888	2.10538
222609	5.78428e-20	6.70506							1561333	0.00971183	2.26718
228183	5.806e-20	5.68752							1558251	0.00971419	3.11955
201978	5.81359e-20	5.61028							227253	0.0097375	3.84833
207564	5.84675e-20	5.36319							229065	0.00974065	2.17573
202126	5.97348e-20	6.17269							219732	0.00978594	2.55614
212326	5.99623e-20	6.02862							1564378	0.0098016	2.74307
217727	6.00582e-20	6.47421							237468	0.00981791	2.20847
226280	6.00891e-20	6.67898							1565597	0.00983116	2.15273
228693	6.11494e-20	5.82894							230926	0.00984968	2.07933
200805	6.11746e-20	6.10124							1561872	0.00985538	2.24924
225209	6.12341e-20	6.29185							237006	0.00989791	2.28295
207721	6.16937e-20	4.69981							208061	0.00990326	2.07844
223244	6.18255e-20	4.26523							203409	0.00991077	3.19365
202678	6.18436e-20	5.57076							1569819	0.00993289	2.34859
49679	6.21591e-20	6.0533							239472	0.00993396	2.8247
242194	6.22099e-20	6.49433							228750	0.00997016	5.7351
202401	6.22651e-20	6.65005							1563460	0.0100043	2.00773
225260	6.23211e-20	5.19316							1553310	0.0100145	2.01919
209463	6.26558e-20	7.0058							201462	0.0100245	2.17408
225763	6.30934e-20	6.50214							239113	0.0100257	3.00779
235872	6.37889e-20	5.50099							221018	0.0100295	2.20937
-3	6.3825e-20	6.42564							1562069	0.010035	2.13394
202466	6.42065e-20	6.91799							220595	0.0100453	4.44451
214902	6.45227e-20	6.45305							227758	0.0100601	2.00735
204300	6.4959e-20	5.88537							1563219	0.0101027	2.16331
225451	6.54233e-20	5.42204							244655	0.010103	2.7616
223988	6.57075e-20	6.76848							244668	0.0101151	2.37529
201070	6.61669e-20	6.17699							204037	0.0101215	2.00709
214305	6.65994e-20	5.96026							1557389	0.0101309	2.19276
200026	6.66024e-20	4.16895							238047	0.0101322	7.18526
227590	6.69837e-20	4.90124							231426	0.0101343	2.4568
210023	6.75158e-20	5.10839							213952	0.0101372	2.60538
204217	6.76573e-20	4.69848							1560787	0.010219	2.36747
219406	6.81695e-20	6.43668							207173	0.0102278	2.54605
218528	6.84116e-20	7.32593							205935	0.0102462	2.04907
244332	6.89272e-20	5.97272							243695	0.0102476	2.12372
223147	6.93809e-20	5.15975							220206	0.0102483	2.12347
201427	7.00338e-20	4.9435							230272	0.0102534	2.92888
226484	7.13035e-20	4.87164							242171	0.0102555	2.80341
1569057	7.17266e-20	4.75391							215791	0.0102899	2.42204
221970	7.17504e-20	6.13084							238967	0.0103127	2.08038
218774	7.21978e-20	6.76879							1553970	0.0103292	2.74444
224479	7.24669e-20	6.98531							220481	0.0103345	2.01218
221994	7.30985e-20	3.54573							228818	0.0103435	2.07165
204218	7.38508e-20	5.29894							1553565	0.0103477	2.17206
1554352	7.42164e-20	4.44659							210606	0.01037	2.22256
55692	7.51358e-20	4.95773							228502	0.0103806	3.41094
208625	7.55078e-20	6.13647							229510	0.0103939	2.15822
223769	7.5571e-20	7.38063							243516	0.0104124	2.01818
226536	7.57837e-20	5.76698							1566695	0.0104232	2.34104
208990	7.63052e-20	6.73755							1556905	0.0104331	2.00543
225689	7.64009e-20	5.59528							232830	0.0104569	2.3372
202333	7.64966e-20	5.28561							220198	0.0104798	3.70191
223236	7.65151e-20	6.10115							215723	0.0105385	2.1541
230178	7.72197e-20	6.2314							1555430	0.0105461	2.28612
212721	7.72626e-20	5.92028							211239	0.010561	3.65264
201320	7.73087e-20	5.15087							241616	0.010607	2.66132
232149	7.81377e-20	4.51924							229030	0.0106165	2.26097
226932	7.83763e-20	5.7972							1557896	0.0106259	2.03695
224467	7.90608e-20	6.09272							1560524	0.0106393	2.07954
214037	7.97897e-20	5.95844							205113	0.0106493	3.0759
212876	8.07919e-20	5.82008							1569354	0.010652	2.51388
230350	8.1052e-20	5.57664							235210	0.0106554	2.4682
1555226	8.1081e-20	5.09314							204110	0.0106616	2.00541
202858	8.17456e-20	5.78239							204362	0.0106748	2.77296
219147	8.18016e-20	6.5794							241214	0.0107026	2.10943
210111	8.1909e-20	5.70643							236829	0.0107308	2.66534
225274	8.25547e-20	5.03465							215966	0.0107344	2.25988
207830	8.26226e-20	6.72432							241124	0.0107396	2.39215
218580	8.34968e-20	5.04074							217085	0.0107404	3.77858
222779	8.35641e-20	4.5644							227958	0.0107468	3.02394
201880	8.48304e-20	6.48881							206264	0.0107516	2.45084
214835	8.54886e-20	6.49176							236081	0.010771	2.40846
219048	8.55531e-20	6.36526							211843	0.0107804	2.09465
228917	8.58832e-20	6.12782							1560890	0.0108059	2.87478
217746	8.62751e-20	4.70847							239209	0.0108208	2.59622
225843	8.65928e-20	5.54535							240366	0.010833	2.06124
204179	8.76561e-20	2.30553							243626	0.0108582	2.01991
204297	8.82001e-20	4.82306							213397	0.0108731	2.63322
201892	8.94986e-20	6.34348							244401	0.0108834	2.47651
222992	8.96096e-20	3.57159							1552737	0.0108872	2.0414
213738	9.05414e-20	3.03994							227752	0.010914	2.39578
203517	9.06863e-20	5.27626							231361	0.0109156	2.79239
212896	9.08008e-20	6.42998							1556639	0.0109326	2.32621
201925	9.13093e-20	7.13347							243538	0.0109446	2.42172
227013	9.18384e-20	7.29712							237097	0.0109493	2.40583
202138	9.2103e-20	4.48572							1569490	0.0109531	3.18446
208973	9.21048e-20	5.0836							206462	0.0109749	2.31745
224599	9.22024e-20	6.01456							243597	0.0109885	2.76277
202117	9.30583e-20	6.17645							236111	0.0109978	2.1968
202776	9.30673e-20	5.56369							1568817	0.0110134	2.15399
210110	9.3632e-20	6.72234							91580	0.0110196	2.05708
218614	9.46847e-20	4.93206							210809	0.01106	5.28015
228049	9.49302e-20	7.42194							237118	0.0110866	2.23323
204076	9.56128e-20	5.06801							235457	0.0110873	3.13945
202846	9.57734e-20	6.05513							1556776	0.0110914	3.29179
204839	9.61124e-20	6.16289							228063	0.0111175	2.09227
209004	9.63964e-20	5.10559							1557529	0.0111188	2.21732
227479	9.65809e-20	5.61358							1561149	0.011128	2.91531
203122	9.88633e-20	5.75757							212865	0.0111281	3.26339
202179	9.94746e-20	4.35508							233160	0.0111296	2.01832
209725	9.95494e-20	5.53339							244599	0.0111557	2.10057
221744	9.96258e-20	5.1801							237122	0.0111834	2.29395
227577	9.96677e-20	6.72251							216148	0.0111837	2.40237
204862	9.97134e-20	5.71538							218477	0.01119	2.3058
226297	1.00095e-19	4.34196							1557261	0.0112117	2.16501
1555567	1.00685e-19	5.51547							240909	0.0112323	2.01047
212751	1.00906e-19	6.35303							214770	0.0112455	3.08478
1554365	1.01509e-19	4.85978							223475	0.0112788	3.1899
209103	1.02353e-19	5.77677							236543	0.0112827	2.57536
221475	1.02407e-19	4.12595							223828	0.0112988	4.1348
226243	1.02733e-19	5.0508							232504	0.011312	2.21087
212826	1.02747e-19	6.09807							231879	0.0113218	2.32575
235431	1.02832e-19	5.95937							202589	0.011322	2.7254
212645	1.04273e-19	5.64215							209737	0.011325	2.215
203546	1.04363e-19	5.3715							232434	0.011351	2.26086
226741	1.04412e-19	5.99913							230238	0.0113556	2.57754
223040	1.05111e-19	5.82364							202638	0.0113577	2.08355
202775	1.06238e-19	5.08118							232182	0.0113662	2.94452
204573	1.06322e-19	6.49296							230892	0.0113681	2.0501
222287	1.06431e-19	4.17101							1554784	0.011387	2.68767
221827	1.07968e-19	6.0951							212992	0.0114334	2.77997
213658	1.08214e-19	5.36221							1568906	0.0114422	2.08602
204496	1.08332e-19	5.96069							1558170	0.0114765	3.37284
209033	1.08891e-19	5.3573							231213	0.0114836	2.67479
213357	1.09179e-19	6.30688							1558109	0.0115049	2.51277
225556	1.10233e-19	5.55334							214755	0.0115725	2.07028
209418	1.1027e-19	5.34113							244393	0.0115854	2.80304
227131	1.10815e-19	6.93254							236167	0.0116016	2.23152
213158	1.1158e-19	5.53344							238552	0.0116029	3.18684
201158	1.11989e-19	6.1704							215779	0.0116078	2.0094
226742	1.12591e-19	5.10863							1558569	0.0116235	2.02595
207760	1.12974e-19	5.73631							229831	0.0116433	3.58902
207573	1.13194e-19	4.80179							242800	0.0116584	2.31228
202231	1.14965e-19	5.48862							1561489	0.0116884	2.41778
207543	1.15557e-19	7.74961							1564093	0.0117274	2.26427
225839	1.15829e-19	6.98527							1561741	0.0117365	3.19425
203428	1.17891e-19	5.37183							219765	0.0117376	3.04402
225614	1.19532e-19	5.54598							228620	0.011742	3.40231
224604	1.19673e-19	5.7974							1553323	0.0117423	2.93317
239398	1.21129e-19	4.17646							1557270	0.011751	2.12654
202174	1.21855e-19	6.12266							207426	0.0117607	2.61711
229436	1.21988e-19	5.96141							1563182	0.0117617	3.61825
204067	1.2304e-19	6.67156							240915	0.0118037	2.59407
219639	1.24357e-19	5.8005							1557620	0.0118076	2.03839
226321	1.24456e-19	5.34667							1554875	0.0118099	2.69021
208717	1.24962e-19	5.15315							1559297	0.011812	2.33636
203624	1.25501e-19	5.31505							222587	0.0118192	2.7537
-3	1.2559e-19	3.82							1562516	0.0118372	2.04839
200081	1.26569e-19	3.75883							241462	0.0118862	2.06223
235015	1.27206e-19	5.57286							229196	0.0119046	2.40502
44146	1.27692e-19	5.79071							223493	0.0119202	2.46212
37590	1.27801e-19	5.71928							220351	0.0119451	3.31494
214087	1.29264e-19	2.53056							211685	0.0119454	2.02601
212435	1.29558e-19	6.14691							231380	0.0119593	2.70467
235344	1.30421e-19	6.04736							215340	0.011974	2.02877
212053	1.31181e-19	5.56386							204205	0.011999	2.03207
238578	1.31871e-19	5.42622							219308	0.0119991	2.56065
218612	1.3357e-19	6.23103							210260	0.0120051	3.153
244052	1.34485e-19	5.03072							243502	0.0120355	2.10689
218270	1.36799e-19	5.33286							230741	0.0120454	3.88675
213846	1.37789e-19	5.14775							231529	0.0120612	2.26196
221772	1.37912e-19	5.98847							205807	0.0120701	2.92764
201366	1.38474e-19	5.37751							219736	0.0120741	4.01804
226500	1.39894e-19	6.092							241717	0.0120785	2.45273
222561	1.4053e-19	5.76517							1558750	0.0120857	4.42097
222035	1.42092e-19	5.13874							220704	0.0120868	2.59072
223033	1.4228e-19	5.74734							1569753	0.0121131	2.51694
222014	1.43228e-19	4.95698							202035	0.0121182	2.14844
210009	1.43311e-19	4.88274							243990	0.0121537	2.25798
224248	1.45015e-19	5.67643							235895	0.0122073	2.79656
213893	1.45176e-19	5.32848							1562790	0.0122096	2.38514
208635	1.45435e-19	4.58125							210533	0.0122115	2.68866
209513	1.45612e-19	5.77954							1561710	0.0122293	2.26062
201680	1.48372e-19	6.92408							228772	0.0122397	5.11066
201175	1.49387e-19	5.45113							223599	0.0122568	3.41145
218977	1.49877e-19	6.38596							203920	0.0122832	2.38513
204631	1.54018e-19	2.37937							1556876	0.012285	4.49718
210944	1.54741e-19	4.29742							244723	0.0122918	2.03516
205060	1.55652e-19	5.82153							235019	0.0123305	2.76759
213041	1.56454e-19	4.89801							207605	0.0123615	3.55915
223133	1.57608e-19	5.59834							1562670	0.0123681	2.46154
206284	1.5814e-19	5.89498							230352	0.0124057	3.25314
214003	1.58934e-19	2.94931							205139	0.0124191	3.47291
208616	1.6263e-19	4.9578							241879	0.0124215	2.06914
212788	1.6275e-19	4.21653							215593	0.0124254	2.81296
209454	1.6279e-19	6.18956							233793	0.0124302	2.23965
203356	1.63549e-19	6.22208							1565746	0.0124595	2.24589
230579	1.65564e-19	5.65889							224463	0.0124887	2.35995
201140	1.65633e-19	5.89915							1562761	0.0125316	2.37792
201853	1.67096e-19	6.38729							201566	0.0125781	2.20344
201619	1.67422e-19	4.4217							243163	0.0125895	2.25346
222428	1.68014e-19	4.94209							216005	0.0126044	3.10985
201121	1.68608e-19	5.75332							1563900	0.0126065	3.83978
220052	1.69902e-19	4.95685							212592	0.0126182	7.55602
221688	1.70121e-19	5.68105							236974	0.012624	2.11751
223162	1.70617e-19	7.54815							231578	0.0126373	2.02039
200966	1.72067e-19	2.65705							207115	0.0126426	3.35291
203737	1.72142e-19	5.72016							240405	0.0126631	2.32035
218957	1.73245e-19	6.85781							205624	0.0126683	2.50552
211115	1.74334e-19	5.70685							1553383	0.0126723	2.32919
202569	1.76239e-19	6.33932							1558971	0.0126862	2.67283
227600	1.77167e-19	5.26151							238720	0.0126968	2.65918
224609	1.77309e-19	6.90484							1556212	0.0126976	4.76011
200869	1.77713e-19	4.39759							204749	0.0127032	5.1175
209669	1.78644e-19	5.09908							234612	0.0127243	2.43195
209429	1.78717e-19	6.61778							236215	0.0127298	3.38667
218366	1.81716e-19	6.43118							1563601	0.0127304	2.47227
203906	1.84005e-19	5.93221							240159	0.0127729	3.41006
206393	1.84012e-19	2.79597							219003	0.0128159	3.48307
204717	1.84179e-19	6.31693							209613	0.0128234	2.77655
218626	1.84895e-19	5.77375							242693	0.0128482	2.14032
203077	1.85105e-19	5.28413							232383	0.0128521	2.76855
236247	1.86269e-19	4.54993							226234	0.0128525	2.09172
213356	1.86489e-19	4.25266							242669	0.0128702	2.10991
227593	1.86614e-19	5.20953							212543	0.0128858	2.30551
201824	1.86711e-19	5.03557							227690	0.0129079	2.14529
201592	1.88587e-19	4.7739							201579	0.0129173	3.29762
211944	1.89632e-19	7.03211							235650	0.0129264	3.29865
208620	1.8996e-19	5.19769							239936	0.01293	2.53952
212032	1.91281e-19	6.78245							240063	0.0129303	3.55619
209475	1.91739e-19	5.34122							1561165	0.0129369	2.07752
213941	1.92248e-19	4.17249							228640	0.0129766	3.08969
202929	1.92726e-19	6.57741							237582	0.0130039	2.30571
202967	1.92878e-19	5.40045							1569808	0.0130049	2.38524
212018	1.93166e-19	5.78456							213943	0.0130251	3.97512
201193	1.93227e-19	5.16501							230071	0.0130684	3.51554
1568618	1.94216e-19	6.56772							1556267	0.0130741	2.28596
213500	1.94429e-19	5.08318							242006	0.013075	2.66937
222578	1.95084e-19	5.38138							1561012	0.0130899	3.28305
208819	1.95926e-19	6.12735							239349	0.0130958	3.64816
202941	1.96655e-19	4.53599							241336	0.0131028	2.33026
218235	1.99199e-19	4.89232							244795	0.0131574	2.01545
202141	1.99852e-19	4.81351							238408	0.0131609	3.32062
200970	2.04079e-19	5.88535							224996	0.0131709	3.44159
208678	2.04645e-19	5.37689							232824	0.0131744	2.10908
227229	2.05518e-19	5.23682							1553335	0.0131918	2.0453
222489	2.07094e-19	5.44486							202357	0.0132125	2.54592
208290	2.07738e-19	5.13005							1405	0.0132208	2.29691
1566509	2.08897e-19	5.22718							1570160	0.0132499	3.02595
201370	2.10074e-19	6.50108							232755	0.0132655	2.0587
218229	2.10411e-19	6.09021							207497	0.0132673	2.26709
1558097	2.10661e-19	6.91966							234075	0.0133113	2.7173
202379	2.11151e-19	7.20493							219564	0.0133412	6.30144
209648	2.13417e-19	6.08701							240772	0.0133442	2.83339
214946	2.13868e-19	6.58906							233088	0.0133532	2.45291
207391	2.21025e-19	6.27163							237787	0.0133981	2.23345
202432	2.24118e-19	4.31273							238718	0.0134007	3.32973
226157	2.24973e-19	6.29213							210889	0.0134142	2.02711
202184	2.25297e-19	7.13648							233934	0.0134409	2.27893
213289	2.27627e-19	5.20392							224214	0.0134436	3.87206
217982	2.28501e-19	4.48961							216478	0.0134459	3.1846
221735	2.28773e-19	6.59398							237249	0.0134695	2.1524
202567	2.30982e-19	6.26246							1552304	0.0134789	2.08205
226728	2.31715e-19	6.74835							232200	0.013512	2.35633
200761	2.32828e-19	4.74017							220188	0.0135442	2.10197
203387	2.33257e-19	6.12835							229357	0.0135511	3.32134
1558487	2.39562e-19	5.07321							221205	0.0135634	3.61565
225810	2.39723e-19	6.99261							237000	0.0135685	2.17029
207416	2.39876e-19	6.6071							208064	0.0135797	2.0803
202753	2.4048e-19	4.76815							1561242	0.0136094	2.70039
208910	2.40846e-19	5.27121							240967	0.0136789	3.28955
203734	2.40916e-19	7.31712							203642	0.0136992	3.83927
212433	2.46907e-19	3.56576							238769	0.0137046	2.01556
225198	2.49335e-19	6.40195							243381	0.0137264	2.13098
1553551	2.50123e-19	2.26893							241168	0.013763	2.23794
229325	2.50553e-19	6.19045							1563611	0.0137645	2.86674
211800	2.50703e-19	5.87178							215976	0.0137877	2.69475
200632	2.53611e-19	6.54756							216493	0.0138196	2.04019
204022	2.5377e-19	6.74351							213435	0.0138352	2.71708
209205	2.54805e-19	4.97999							220432	0.0138368	3.38586
218263	2.54954e-19	6.00944							233059	0.013842	6.14784
220731	2.57306e-19	5.33372							206377	0.0138666	2.14246
234311	2.58765e-19	6.52112							206785	0.0138786	3.96466
224678	2.60331e-19	4.71861							204748	0.0139401	2.52382
219709	2.62072e-19	5.57235							1557179	0.0139534	2.47032
225477	2.63055e-19	6.28034							1555248	0.0140104	2.12598
224318	2.63678e-19	5.45932							1556595	0.0140159	3.44249
212406	2.64379e-19	5.78871							241110	0.0140189	2.24044
212087	2.65148e-19	5.0602							1560987	0.0140242	2.52814
222553	2.6622e-19	6.32824							1568655	0.0140299	2.08077
218853	2.72751e-19	5.36851							232562	0.0140412	2.29321
212165	2.73584e-19	5.40505							1564767	0.0140439	2.18324
231899	2.7426e-19	5.56818							1566447	0.0140548	2.18496
218971	2.74693e-19	5.38922							209771	0.0140643	2.15934
222495	2.74833e-19	5.25178							211641	0.0140677	2.0049
224654	2.7556e-19	5.1899							231098	0.0141357	3.56835
211946	2.75883e-19	6.49796							1569611	0.0141553	2.49111
225692	2.7636e-19	5.29868							227612	0.0141572	2.17036
225063	2.76393e-19	5.83342							1562648	0.0141881	2.4136
205672	2.76831e-19	6.2325							216870	0.0141916	3.07176
205687	2.80435e-19	7.07473							236704	0.0141995	3.76431
218606	2.83591e-19	5.36243							1559975	0.014229	2.59149
218271	2.85172e-19	6.75358							222689	0.0142477	3.67777
201713	2.85262e-19	6.32741							207480	0.0142667	2.21545
204740	2.85545e-19	6.42939							214564	0.0142824	2.0458
224854	2.87977e-19	4.2697							1554808	0.0143052	2.01328
225213	2.90526e-19	4.38807							1559026	0.014335	2.38251
221693	2.90663e-19	6.37987							225342	0.0143498	2.33536
228992	2.92092e-19	7.17782							201108	0.0143509	2.34171
218337	2.93133e-19	5.32909							1564665	0.0143709	2.39889
217672	2.97148e-19	5.97067							231498	0.0143889	2.19009
200760	2.99313e-19	5.07458							238846	0.0144041	2.64428
217352	2.99953e-19	6.79758							243284	0.0144386	2.48974
233124	3.02567e-19	5.15128							241900	0.0144664	2.16539
222784	3.02986e-19	7.07787							1568920	0.0144686	3.87305
218767	3.03129e-19	5.45393							1569369	0.0144727	2.56209
242735	3.03606e-19	6.63563							1566896	0.0144757	2.80957
200040	3.04585e-19	6.53881							223556	0.014498	2.16025
51774	3.07639e-19	5.30957							244745	0.0145163	4.16437
200094	3.0844e-19	3.90005							1557557	0.0145311	2.93901
229488	3.08555e-19	6.04848							233826	0.0145493	2.8685
211097	3.09064e-19	4.38344							203903	0.0145572	3.62563
209376	3.09824e-19	7.14629							1558041	0.0145868	2.10123
1552286	3.10492e-19	5.72566							1562576	0.0145909	3.02116
228249	3.11993e-19	4.93024							240836	0.0146073	2.51866
224437	3.17776e-19	6.1438							230480	0.0146081	2.21963
221971	3.19192e-19	6.09536							1560727	0.0146114	2.14761
218912	3.20651e-19	5.61886							237133	0.0146273	3.56809
226093	3.21213e-19	6.79516							1557812	0.0146288	2.64399
218460	3.25301e-19	5.66268							204720	0.0146352	4.15156
228891	3.27282e-19	4.98659							237953	0.0146772	2.38562
201132	3.2966e-19	6.64923							1556226	0.0146825	2.51637
202298	3.29753e-19	4.09875							220065	0.0146868	4.58075
201653	3.30302e-19	5.61019							1557385	0.0147239	2.20877
212017	3.31602e-19	5.47599							1569182	0.0147456	2.45214
215111	3.33198e-19	6.27685							212650	0.0147616	2.7483
203941	3.33955e-19	5.96463							219008	0.0147865	2.56701
231847	3.35406e-19	5.69824							1560776	0.0148047	2.54757
200663	3.3636e-19	4.56495							233900	0.014836	2.2891
211271	3.39344e-19	5.65904							1567045	0.0149175	2.30317
241202	3.39614e-19	5.15513							206711	0.0149408	2.14363
218238	3.3978e-19	5.6677							203710	0.0149949	2.62269
226897	3.39931e-19	6.91236							210375	0.0149983	4.27747
216071	3.44131e-19	4.61065							1553995	0.015016	2.21103
202265	3.44456e-19	5.88809							204112	0.0150379	2.08571
214911	3.45635e-19	6.39289							234313	0.0150445	2.6184
209362	3.48661e-19	5.90163							1569952	0.0150472	2.26732
231714	3.48974e-19	5.80022							244444	0.0150591	2.58458
215416	3.49024e-19	6.13762							202619	0.0150795	2.46583
201646	3.49749e-19	5.70817							219427	0.0151212	2.35504
224504	3.53081e-19	6.67435							215446	0.0151333	4.77392
232186	3.54659e-19	5.47069							1563833	0.0151515	2.54502
78495	3.55272e-19	6.02678							215959	0.0151629	2.41858
225143	3.58344e-19	5.85601							1560779	0.0151684	3.22527
212115	3.59259e-19	6.73465							230372	0.0151864	2.38432
228189	3.59595e-19	6.38588							232054	0.0152192	2.60994
223064	3.59809e-19	5.67383							215297	0.0152229	2.69972
224759	3.60174e-19	5.86443							243306	0.015226	2.08066
34697	3.64597e-19	4.31554							1564699	0.0152414	2.71381
202622	3.66319e-19	5.50572							216944	0.0152522	3.79934
224738	3.66648e-19	5.90437							223586	0.0152642	2.34088
200046	3.6986e-19	5.76086							223688	0.015284	3.0722
224698	3.744e-19	6.47694							211127	0.0153031	2.37366
223701	3.79249e-19	6.34213							205518	0.0153563	3.0689
225648	3.81783e-19	6.49231							1561763	0.0153759	2.62626
204810	3.81849e-19	2.22265							220010	0.0154168	3.0341
242935	3.84053e-19	4.29286							1563070	0.0154272	2.04492
201594	3.84069e-19	5.23633							1570398	0.0154474	2.69991
220081	3.84829e-19	7.36603							238784	0.015452	2.61614
215004	3.85047e-19	6.06679							233547	0.0154684	3.47238
208855	3.86199e-19	5.57007							227553	0.0154766	2.23699
216883	3.87463e-19	5.44441							219573	0.0154787	2.06759
214802	3.90547e-19	6.18967							232064	0.0154868	2.78648
212150	3.91577e-19	6.33879							1562588	0.0154993	3.27475
223803	3.93571e-19	5.16511							238332	0.0155029	2.10307
214938	3.93849e-19	4.21082							234502	0.0155397	2.18617
201989	3.96103e-19	6.85798							225548	0.0155792	2.19528
209250	3.96214e-19	6.51619							1555091	0.0155887	2.27778
224612	3.99456e-19	5.67251							231518	0.015603	2.28495
213772	4.0038e-19	6.59596							229498	0.0156109	3.54958
232382	4.01745e-19	5.62294							201124	0.0156184	2.33688
200809	4.03046e-19	3.70144							1557081	0.0156197	2.04358
216515	4.05004e-19	6.27233							1556879	0.0156452	3.35781
226696	4.05667e-19	4.73119							229156	0.015649	2.20001
212615	4.06277e-19	5.47719							1566150	0.0156507	2.45948
204093	4.09885e-19	5.37457							239325	0.0156623	2.20296
210825	4.13084e-19	4.96925							218404	0.0156765	2.38825
205273	4.14461e-19	5.86745							235353	0.0157035	2.50033
201266	4.16964e-19	5.76544							224327	0.0157106	2.5197
204278	4.19113e-19	6.46718							233592	0.0157112	2.44981
221913	4.19209e-19	5.27619							216708	0.0157138	2.43949
201097	4.21065e-19	5.34521							214956	0.0157252	2.76917
226862	4.27298e-19	5.55416							242854	0.0157412	2.42324
223070	4.29973e-19	5.50029							206858	0.0158023	3.24903
211208	4.307e-19	5.2181							239674	0.0158091	2.07912
213628	4.31318e-19	6.05016							234651	0.015839	2.27349
212195	4.33577e-19	6.05076							227928	0.0158508	2.80052
225578	4.34923e-19	6.64116							205532	0.0158834	3.32548
212359	4.3553e-19	6.82088							234100	0.0159533	3.41184
203874	4.37475e-19	6.14612							210078	0.0159607	4.50274
221257	4.39819e-19	5.99913							1552910	0.015969	2.12425
208929	4.39913e-19	3.90033							219685	0.0159728	2.70207
217317	4.40081e-19	6.95695							1561550	0.0159912	2.07302
201228	4.41858e-19	6.05597							210471	0.0159978	2.23748
217832	4.48224e-19	6.56022							222881	0.0160258	2.1474
225170	4.52025e-19	5.0438							1559571	0.0160511	2.02145
209104	4.57476e-19	5.04208							233538	0.0160585	2.4201
221192	4.58928e-19	5.15342							223800	0.0160651	2.80901
200765	4.70072e-19	6.34108							206300	0.0160731	2.46584
218905	4.73175e-19	6.34392							230793	0.016076	3.32914
37943	4.73604e-19	6.46077							221391	0.0160894	2.1865
225729	4.75095e-19	5.60407							220161	0.0160987	2.41405
205788	4.80264e-19	5.16395							219846	0.0161341	2.09399
220127	4.80555e-19	5.35095							229554	0.0161384	3.09017
1553101	4.80731e-19	5.94381							206837	0.0161634	2.04555
230176	4.83346e-19	5.04401							237634	0.0161658	3.02165
227416	4.84443e-19	4.87465							227312	0.016173	2.34734
218098	4.87223e-19	6.70988							244455	0.0161743	5.22115
224326	4.89919e-19	4.67831							235654	0.0161786	2.13847
229582	4.96937e-19	6.03151							1554865	0.0162356	2.43728
223401	4.99576e-19	5.16765							231993	0.0162389	2.26323
203611	5.05117e-19	6.84718							1559020	0.0162514	2.55039
203011	5.15988e-19	5.33745							237745	0.0162577	2.36174
227877	5.18377e-19	5.95029							239648	0.0162677	2.39557
34408	5.20375e-19	4.5291							216967	0.0162731	2.00526
232168	5.26047e-19	7.05582							237369	0.0162746	3.0008
225389	5.27446e-19	5.07575							232375	0.0163505	2.04169
209533	5.28691e-19	5.49274							1552787	0.0163621	2.93792
215090	5.2949e-19	6.02735							238264	0.0163829	2.10899
222011	5.30922e-19	5.51488							238410	0.0164103	2.08989
209161	5.34427e-19	6.39255							233739	0.0164463	2.3053
209411	5.40563e-19	5.08388							241716	0.0164543	2.74695
207000	5.42676e-19	7.41767							207517	0.0164695	2.0874
220661	5.45274e-19	5.55336							1560204	0.0164939	2.1147
204087	5.46185e-19	5.0166							220784	0.0164965	3.47491
217256	5.47371e-19	5.56231							230781	0.0165265	3.48951
226156	5.48522e-19	6.88179							225911	0.0165488	4.05774
219548	5.51199e-19	5.78184							202661	0.0165535	2.19857
202675	5.53178e-19	5.0598							202990	0.0166252	2.06069
221568	5.54217e-19	6.33901							243198	0.0166253	2.63737
202299	5.54371e-19	4.6341							241242	0.0166324	2.72196
222579	5.55264e-19	5.37733							243866	0.0166458	2.77716
222867	5.5985e-19	4.98747							236875	0.0166881	3.41061
219065	5.62793e-19	5.38786							231115	0.0167292	2.02973
217927	5.63486e-19	5.46482							233925	0.0167408	2.07106
210976	5.64693e-19	3.12014							242894	0.0167501	2.95911
211890	5.65882e-19	4.35934							244620	0.0167507	2.78641
224281	5.66043e-19	4.98274							240115	0.01677	2.06661
209089	5.75044e-19	5.95265							244461	0.0167912	2.76185
226128	5.79025e-19	7.00278							204755	0.0168075	2.64033
203640	5.80699e-19	5.36353							204024	0.016821	2.5857
220746	5.81293e-19	5.71434							238969	0.0168657	2.818
209090	5.84971e-19	5.88484							235551	0.0168694	2.01862
219203	5.85152e-19	6.50884							231977	0.0168738	2.02834
225865	5.86704e-19	5.98303							231196	0.0168822	2.07677
209127	5.87728e-19	6.68807							203128	0.0168853	2.24215
1560443	5.94749e-19	4.82014							233370	0.0169368	2.21182
202842	5.97866e-19	5.69871							207333	0.0169463	2.0529
227407	5.9919e-19	7.04584							233705	0.0169618	2.23949
226851	5.99302e-19	4.96627							226771	0.0169907	2.27058
208832	6.03463e-19	5.7511							243384	0.0169932	2.11259
213619	6.03734e-19	4.04277							214872	0.0169942	2.03821
210463	6.05521e-19	6.11136							1561240	0.0170282	2.60648
208887	6.07262e-19	5.75092							1557122	0.0170358	4.10358
201060	6.07904e-19	6.4404							215428	0.0170394	2.15655
203075	6.16303e-19	6.2176							230930	0.0170453	2.41047
221540	6.18583e-19	5.70937							1569510	0.0170554	2.32436
202548	6.22287e-19	5.94552							221042	0.0170826	2.68081
217750	6.2278e-19	5.72596							235873	0.0170975	2.61302
213090	6.27892e-19	6.73427							225285	0.017141	4.22081
221699	6.28265e-19	6.73473							205085	0.0171419	2.07641
1554089	6.31518e-19	5.39043							231033	0.0171669	2.08379
225676	6.33112e-19	5.09551							232664	0.0172506	2.10845
212348	6.38877e-19	6.70134							214964	0.0172785	2.84903
224446	6.39431e-19	4.97872							230545	0.017304	2.88416
213399	6.42086e-19	5.40799							220038	0.0173815	2.11878
218992	6.43612e-19	5.22063							203717	0.0174063	2.30596
218041	6.43903e-19	5.1615							240819	0.0174413	2.20736
203435	6.49218e-19	4.86655							243484	0.0174558	2.24457
201900	6.59628e-19	5.84383							1555854	0.0174615	4.43927
225127	6.60456e-19	6.21643							1554633	0.0174781	2.41737
242492	6.60879e-19	5.54054							215176	0.0175083	2.58202
232892	6.62492e-19	5.91577							1557057	0.0175109	2.604
218344	6.63155e-19	4.97537							231149	0.0175402	2.68069
207023	6.64304e-19	5.03196							1569980	0.0175866	2.13936
212897	6.66376e-19	5.74714							211842	0.0175917	2.72892
224492	6.68483e-19	6.90121							237512	0.0176039	2.08713
222329	6.6987e-19	6.01025							228573	0.017621	2.05031
212434	6.7019e-19	6.38364							1566958	0.0176235	2.04471
222726	6.71506e-19	5.75064							218706	0.0176314	2.12829
203258	6.72966e-19	5.28652							208296	0.0176668	3.25741
218969	6.76485e-19	6.23707							237916	0.0176775	2.97298
224704	6.79516e-19	6.77892							1552714	0.01769	2.05195
201258	6.87733e-19	3.79713							201058	0.0176941	2.0247
39891	6.91166e-19	5.19392							237886	0.017695	2.68309
201057	6.93171e-19	5.01254							235518	0.0177402	4.45275
219144	6.96982e-19	6.32184							209135	0.0177683	5.366
218556	6.97404e-19	5.16581							228237	0.0177718	2.08306
217783	6.99767e-19	5.98099							238075	0.0177839	2.0291
219974	7.04267e-19	5.1248							241559	0.0178208	2.02636
231870	7.07781e-19	6.25904							240279	0.0178228	2.76344
201620	7.10252e-19	6.10641							240903	0.0178492	2.02555
211342	7.1411e-19	4.91054							1554668	0.0179792	2.2741
200854	7.16122e-19	6.71011							236711	0.0179918	2.16267
202011	7.18797e-19	5.68197							216286	0.0180068	2.61703
238715	7.21695e-19	5.94944							234670	0.0180281	2.12099
219598	7.23051e-19	4.93435							214382	0.0180446	2.05192
227273	7.28693e-19	5.95532							220594	0.0180528	2.06954
212765	7.29694e-19	6.30644							206685	0.0180918	2.67654
200640	7.31745e-19	7.20023							234346	0.0180926	3.34918
203437	7.32216e-19	5.10579							233713	0.0181069	2.75161
223416	7.32713e-19	5.92626							241803	0.0181199	2.10874
225392	7.35414e-19	5.44505							1565602	0.0181442	6.18888
202867	7.42772e-19	5.93142							205415	0.0181463	2.44115
212470	7.42981e-19	4.9411							238674	0.0181583	2.408
221725	7.44454e-19	5.53303							1564358	0.018175	2.23451
227150	7.4535e-19	6.78115							206026	0.0181825	2.16704
218836	7.45574e-19	6.28466							239104	0.0181861	2.30013
225395	7.49615e-19	5.81179							1558706	0.0182499	2.06637
220486	7.53774e-19	5.25963							212640	0.0183014	2.35237
224280	7.58224e-19	5.54883							222773	0.0183395	2.24426
218474	7.64038e-19	5.45719							243221	0.0183403	2.04252
218281	7.70392e-19	5.56616							1562288	0.0183714	2.80638
37586	7.80927e-19	5.56686							234739	0.0183972	2.24217
212244	7.81284e-19	6.77576							233879	0.0184391	2.17109
200964	7.88274e-19	5.37628							233216	0.0184644	2.12342
224705	7.91306e-19	5.20003							223481	0.0185065	2.04302
224789	7.91345e-19	6.11073							242086	0.0185491	2.50741
209481	7.93649e-19	6.66244							1565860	0.01857	2.22462
226909	7.95958e-19	5.87122							1560798	0.0185949	2.10233
211615	7.9728e-19	5.5481							205612	0.0186658	3.55982
208697	7.97833e-19	4.91862							1560049	0.0187211	2.12431
221535	7.99237e-19	5.44887							209582	0.0187394	2.00275
226244	8.01759e-19	5.09182							1558987	0.0187698	2.24291
225430	8.11721e-19	6.28769							229649	0.0187778	2.88783
200823	8.12678e-19	4.00777							238533	0.018844	2.68123
208952	8.13212e-19	7.30217							202555	0.018861	2.00012
222661	8.19293e-19	6.14436							228368	0.0188637	3.58868
237239	8.23542e-19	6.44166							244749	0.0188735	2.38285
225405	8.25295e-19	6.34566							232874	0.0188819	2.01723
233669	8.38491e-19	6.52813							230280	0.0188861	2.12429
202066	8.39164e-19	5.63317							227927	0.0189147	2.42001
233559	8.39221e-19	5.88613							206104	0.0189243	2.68713
210645	8.40176e-19	6.23533							244802	0.0189615	3.07303
200689	8.45968e-19	2.90842							242405	0.0189968	2.05155
201783	8.5595e-19	6.64039							224185	0.0190388	2.03332
201607	8.56995e-19	5.43422							237413	0.0190459	2.35399
217907	8.58411e-19	5.28239							225809	0.0190498	2.10045
231914	8.65101e-19	6.94524							225491	0.0190664	2.21341
200833	8.68784e-19	7.05443							201615	0.0190859	2.1637
1563315	8.72138e-19	5.49419							214063	0.0190914	2.37336
225278	8.79228e-19	4.96504							225728	0.019095	3.76415
213654	8.81283e-19	5.99381							210303	0.0190967	2.05483
225204	8.83792e-19	5.09565							233636	0.0190988	2.67919
212454	8.84038e-19	5.78619							231091	0.0191261	2.17297
222976	8.85593e-19	6.65445							209921	0.0191545	2.30964
208756	8.87356e-19	5.74947							206631	0.0192025	2.22339
208949	8.90042e-19	5.41262							208396	0.0192579	2.34915
223100	8.94346e-19	5.60299							212681	0.0192969	6.52528
203405	8.95459e-19	5.88911							229974	0.0193006	2.32382
201552	8.96959e-19	6.00996							236236	0.0193031	2.02701
208912	9.0398e-19	6.95094							206761	0.0193201	2.23108
231831	9.10406e-19	5.79906							214469	0.019338	2.38278
203334	9.10672e-19	4.62818							1561493	0.0193524	2.29741
225945	9.18737e-19	5.58346							235318	0.01937	2.74067
208668	9.19182e-19	5.04926							236201	0.0194376	2.71887
203459	9.20107e-19	5.84678							239697	0.0194378	2.33957
226588	9.20657e-19	6.76561							242559	0.0194452	2.08745
201029	9.22883e-19	5.58883							224048	0.0194532	2.26752
215482	9.27152e-19	6.43025							1553739	0.0194629	2.32658
218569	9.3403e-19	7.53315							227014	0.0194678	2.61754
218225	9.35694e-19	5.57401							235276	0.0194688	3.14374
202429	9.38314e-19	5.38658							228423	0.0194774	3.38951
200816	9.41564e-19	5.55623							221352	0.0194881	2.02745
230851	9.47329e-19	6.2753							224209	0.0194924	4.17269
224619	9.47586e-19	5.61697							1559879	0.0195124	2.26897
222033	9.47886e-19	6.0035							241057	0.0195675	2.86087
227567	9.514e-19	6.44649							1561362	0.0195973	2.13019
220408	9.51519e-19	5.61631							239046	0.0196434	2.11263
200001	9.556e-19	4.967							238838	0.0196845	2.00087
227049	9.58273e-19	6.03628							232549	0.0196991	2.90093
228030	9.64099e-19	6.35224							229254	0.0197345	3.13094
201245	9.64827e-19	5.23882							204298	0.0197702	2.40477
219233	9.82985e-19	6.20831							236013	0.0197756	2.32703
219963	9.83237e-19	4.72639							234255	0.0197865	2.30172
209388	9.85531e-19	5.01388							221118	0.0197997	2.0991
223054	9.92336e-19	5.55774							205560	0.019851	2.65971
216251	1.00228e-18	4.91479							216763	0.0198663	2.42575
208660	1.00695e-18	3.86552							243551	0.0198693	2.31448
1565802	1.01896e-18	6.13331							242676	0.0198969	2.48709
200095	1.02502e-18	3.52202							237056	0.0199199	2.41572
224892	1.02845e-18	5.61156							242279	0.0199335	2.17641
211052	1.02933e-18	5.41419							213960	0.0199424	3.45985
200750	1.03136e-18	5.21855							238117	0.0199598	2.26186
204011	1.0345e-18	5.52396							1553894	0.0199763	2.87582
214194	1.04152e-18	6.08103							232424	0.0200556	3.29326
218003	1.04631e-18	4.60357							227059	0.0200584	2.05205
225730	1.04874e-18	5.8917							201951	0.0200968	3.13322
202242	1.05061e-18	6.04162							214954	0.0201541	5.9143
225573	1.05367e-18	5.80777							1568848	0.0201861	2.12532
218185	1.05379e-18	5.68085							1553004	0.0202461	2.61988
212870	1.06849e-18	5.22422							228507	0.0202606	2.68134
203261	1.07433e-18	5.06102							1569080	0.020272	2.47907
208066	1.07736e-18	6.73203							239494	0.0202733	2.08481
218399	1.08692e-18	5.4301							231029	0.0202787	2.38809
202213	1.09639e-18	4.25132							209487	0.0202809	2.26526
201390	1.10426e-18	5.78914							1560932	0.0202849	2.00266
210574	1.10716e-18	6.01411							242899	0.0202948	2.99218
224629	1.10828e-18	4.89172							236280	0.0203232	2.54108
223179	1.10861e-18	6.00575							242385	0.0203438	2.32867
234036	1.11187e-18	5.13031							1557726	0.0203554	2.9676
236874	1.12382e-18	6.32164							1557558	0.0203716	2.27335
225339	1.1364e-18	6.16337							1560542	0.0203792	3.17651
223711	1.13829e-18	5.99131							1556579	0.020448	3.97422
213400	1.14636e-18	5.24287							241089	0.0204586	2.47288
223433	1.15131e-18	5.49747							219734	0.0204595	2.29066
53076	1.15826e-18	5.35692							201890	0.0204905	2.27868
201722	1.15907e-18	5.9804							240906	0.0205693	2.0645
200904	1.1601e-18	5.95679							235188	0.0205862	2.30783
228013	1.16068e-18	6.96826							222721	0.0205938	2.35358
212395	1.16133e-18	6.65627							204363	0.0206036	2.5096
201520	1.16544e-18	4.81614							235795	0.0206314	3.73107
228566	1.1895e-18	4.92402							222416	0.0206378	2.09419
202377	1.19139e-18	5.71994							1566505	0.0206403	2.67517
200949	1.19201e-18	3.43804							229491	0.0206538	2.2881
226965	1.19352e-18	4.89491							219507	0.0206764	2.16793
233746	1.19455e-18	6.94175							1552296	0.0207081	2.5826
220526	1.19604e-18	5.74723							233527	0.0207569	2.28722
221277	1.20187e-18	5.46103							243608	0.0207919	2.01973
226171	1.20191e-18	5.01078							241765	0.020794	4.45129
218289	1.229e-18	5.75286							221911	0.0208206	3.28911
217874	1.22918e-18	4.42622							243784	0.0208652	2.60353
202224	1.23102e-18	7.29491							1554403	0.0208806	2.36356
206860	1.23662e-18	5.90598							241835	0.020895	3.23197
201471	1.24261e-18	4.83336							241890	0.0209023	2.12825
212459	1.24718e-18	5.62072							1556787	0.0209161	2.14553
204269	1.25057e-18	5.43091							220952	0.0209165	2.92759
228177	1.25219e-18	6.09054							229850	0.0209423	2.99883
205353	1.25279e-18	6.23581							215598	0.0209728	2.87311
214214	1.26265e-18	5.54311							222457	0.0209839	2.04257
213969	1.26472e-18	3.21956							209602	0.0209994	2.48546
238761	1.26856e-18	6.08141							230356	0.021011	2.0566
200086	1.27762e-18	3.98861							239954	0.0210322	2.81123
217830	1.27887e-18	5.68078							207766	0.0210411	2.53102
214205	1.28213e-18	4.69324							216233	0.0210607	2.99225
201186	1.29401e-18	6.30862							1569652	0.0210654	2.22947
209484	1.29826e-18	6.81037							229928	0.0210779	2.60375
212457	1.29951e-18	6.04571							1566658	0.0210895	2.37045
225138	1.30666e-18	6.0906							241891	0.0210977	2.24622
212747	1.31119e-18	5.1226							241247	0.0211024	2.48231
202744	1.32751e-18	6.73844							235841	0.021103	2.71099
226092	1.33292e-18	5.41596							238140	0.0211247	2.20538
225696	1.33984e-18	6.03563							235452	0.0211256	2.08166
200968	1.34243e-18	5.77607							234262	0.0211423	2.22054
49485	1.34444e-18	5.16206							240766	0.0211602	2.35031
218143	1.3518e-18	6.55102							205626	0.0211662	2.12448
207196	1.36887e-18	5.16601							1562957	0.0211718	2.01988
215404	1.37794e-18	6.58275							229095	0.0211865	2.90356
211950	1.3791e-18	5.30955							236139	0.0212501	2.18267
208703	1.37928e-18	5.55442							224496	0.0212558	2.71884
227895	1.39103e-18	6.39103							1570031	0.0212726	2.15812
222423	1.39688e-18	5.62583							238292	0.0212983	2.04434
224926	1.40744e-18	6.12487							1569674	0.0213363	2.40235
201972	1.412e-18	5.8927							219469	0.0214431	2.19992
200599	1.41315e-18	5.66558							220026	0.0214564	2.12058
203947	1.42618e-18	5.11824							240921	0.0214798	2.78617
225364	1.4311e-18	5.31566							240829	0.0214963	2.3146
202293	1.43246e-18	5.63434							241289	0.0215259	2.09351
224622	1.43858e-18	5.7077							237893	0.0215398	3.11706
223211	1.44389e-18	6.81532							239047	0.0215415	3.16952
226207	1.44732e-18	5.1363							234174	0.0216055	2.03153
204605	1.4555e-18	5.97582							228900	0.021613	2.05991
202542	1.46315e-18	5.54389							244558	0.0216912	2.12274
222500	1.47236e-18	6.43489							220092	0.0216943	2.09677
214341	1.48163e-18	4.1521							228534	0.0217075	2.06952
214846	1.48173e-18	6.75128							214664	0.0217496	2.37313
208405	1.48256e-18	5.4275							217562	0.0217999	2.79719
201434	1.48277e-18	5.52028							235351	0.0218192	3.04811
218732	1.48591e-18	5.23085							222016	0.0218203	2.25615
235367	1.49448e-18	6.57519							241304	0.0218324	2.11052
221700	1.49566e-18	4.07997							216634	0.0218455	2.34034
1563783	1.49732e-18	4.80398							1558871	0.0218508	2.30332
224057	1.49887e-18	5.89827							215796	0.0218579	2.09733
201002	1.50094e-18	4.60543							215846	0.0218943	2.3599
206495	1.5245e-18	5.36429							230135	0.0218992	2.67631
236154	1.52719e-18	6.28796							241604	0.0219024	2.11368
231422	1.54019e-18	5.23687							207037	0.0219116	2.02034
217798	1.54569e-18	6.51533							239108	0.0219267	2.03168
201956	1.55075e-18	5.36102							223679	0.021933	2.02573
214099	1.5518e-18	5.96191							1555963	0.0219346	2.48407
218212	1.55489e-18	5.30671							220940	0.0219357	2.87645
221494	1.5549e-18	4.46446							234700	0.0219414	2.2168
218740	1.55769e-18	5.61342							1566832	0.0219466	2.13688
226257	1.56882e-18	5.51657							1570574	0.0219799	2.05712
201115	1.57916e-18	5.65295							220900	0.0220088	2.53629
203733	1.59753e-18	5.22151							204014	0.0220278	3.76031
208877	1.60165e-18	7.30954							240408	0.0220474	2.38306
227179	1.62389e-18	5.65971							1552673	0.0220576	2.24864
244648	1.62425e-18	5.97668							242916	0.0220587	2.93838
202599	1.62898e-18	5.68651							1557126	0.0221334	2.45181
218290	1.63057e-18	6.07044							203343	0.0221442	3.4322
1557950	1.64298e-18	5.96525							213652	0.0221531	3.12678
209317	1.64326e-18	5.56165							237860	0.0221578	2.66908
225162	1.6537e-18	5.01777							1556144	0.0221623	2.19604
211956	1.65652e-18	3.12643							1555303	0.0221895	2.84732
225000	1.65936e-18	5.36778							229383	0.0222128	2.1072
212440	1.66155e-18	5.64938							237142	0.0222165	2.10732
200063	1.66309e-18	4.55466							217523	0.0222237	2.10764
230650	1.67374e-18	6.3273							218355	0.0222679	2.01881
213699	1.68083e-18	6.11486							214111	0.022293	2.59281
241997	1.68774e-18	7.44044							214321	0.0223136	2.92052
208120	1.69568e-18	5.55789							1559360	0.0223591	5.80315
211747	1.69643e-18	6.20153							1563373	0.0223855	2.28073
200098	1.71394e-18	5.25017							222455	0.0224165	3.48718
226713	1.71663e-18	5.81808							1553524	0.0224264	2.01372
223087	1.72367e-18	5.44887							1561450	0.022485	2.31813
206050	1.72995e-18	5.89337							242660	0.0224903	2.58818
223366	1.73301e-18	6.292							241713	0.0224956	2.60077
212983	1.73898e-18	4.86985							238139	0.0225101	2.58995
221873	1.74008e-18	5.29707							1569230	0.0225197	3.63521
203774	1.74376e-18	5.66965							1561761	0.0225238	2.65745
201599	1.74607e-18	5.48096							228141	0.0225267	3.6693
236435	1.75878e-18	5.26762							242758	0.0225278	2.8433
217852	1.76534e-18	5.43784							239393	0.0225591	2.02103
227261	1.768e-18	6.29538							237528	0.0226141	2.15741
200759	1.76825e-18	3.94104							217536	0.0226209	2.13616
211961	1.78359e-18	5.343							242321	0.0226436	3.34282
225182	1.78448e-18	6.99266							238454	0.0226537	2.22788
202461	1.79122e-18	5.95687							233330	0.0226617	2.1669
205474	1.79415e-18	6.11126							214161	0.0226808	3.18644
212589	1.81164e-18	5.54464							223597	0.0226839	4.09454
243976	1.84125e-18	6.81713							1569975	0.0227004	2.15259
203556	1.84155e-18	6.76142							233086	0.0227855	2.2227
201561	1.84701e-18	6.43333							244389	0.0227905	2.58601
218968	1.85114e-18	5.79441							229715	0.0228254	2.54112
201347	1.86186e-18	5.67715							1560755	0.0228626	2.3931
201114	1.86466e-18	4.75025							236360	0.0230473	2.95743
203266	1.89175e-18	5.26819							1561979	0.0231013	2.12873
218089	1.90643e-18	5.79021							240453	0.0231363	2.91785
208617	1.91169e-18	5.11192							241898	0.0231466	2.06776
225652	1.92284e-18	5.76513							233569	0.0231707	2.13576
228342	1.92848e-18	6.85489							242544	0.0232089	2.70824
213296	1.9335e-18	6.3151							219093	0.0232399	3.15001
217168	1.9355e-18	5.23262							1554294	0.0232591	2.51637
211015	1.94043e-18	5.3792							230042	0.0232607	3.37278
217742	1.9433e-18	6.0993							215717	0.0233352	2.07417
205078	1.97112e-18	6.14953							219905	0.0233612	2.16554
NaN	1.97835e-18	6.01326							214677	0.0234033	2.30494
203569	1.97943e-18	5.00708							221556	0.0234276	2.48443
224288	1.99142e-18	6.11412							215901	0.0234649	2.19536
226103	2.00672e-18	4.32263							1560864	0.0235019	2.08512
219350	2.01821e-18	6.22389							238018	0.0235161	2.84288
222614	2.02368e-18	5.61161							1552532	0.0235165	2.29794
223140	2.02565e-18	5.56047							227926	0.0235236	2.92591
212313	2.02814e-18	6.16435							1561018	0.0235729	2.2957
226012	2.0516e-18	5.20666							223435	0.023574	2.21688
208826	2.05685e-18	4.63656							243555	0.0236327	2.91358
202021	2.06218e-18	3.59447							1563963	0.0236408	2.39677
202041	2.10161e-18	5.30453							219014	0.0236777	2.03496
201345	2.10463e-18	5.31189							1559589	0.0237536	2.38125
202453	2.10575e-18	4.80445							206100	0.0237891	3.57163
225420	2.10853e-18	9.64002							216459	0.0237979	2.49364
227707	2.12068e-18	5.22423							239447	0.0238355	2.58415
223375	2.12121e-18	5.81731							1559336	0.0238715	2.7517
217719	2.14125e-18	3.89075							239229	0.0238754	2.23571
212603	2.15153e-18	5.53387							1555875	0.0238971	2.45155
227442	2.15742e-18	5.46354							227529	0.0239257	5.62853
234055	2.18378e-18	5.41894							219885	0.023947	2.7501
208967	2.18386e-18	5.10001							1560354	0.0239846	2.16338
226056	2.19184e-18	4.87553							215049	0.023997	2.32702
235384	2.19806e-18	6.50654							241412	0.0240026	3.34681
201891	2.19897e-18	3.64869							232236	0.0240285	2.01497
213988	2.20225e-18	6.65492							235662	0.0240349	2.62565
214870	2.20411e-18	5.67281							227884	0.0240535	2.07006
203616	2.21267e-18	5.7564							236452	0.0240872	2.00789
224744	2.22476e-18	5.05988							210945	0.0240981	2.0394
210616	2.23038e-18	5.96156							222038	0.0241122	2.09672
201296	2.23834e-18	5.98888							203414	0.0241393	2.68883
228222	2.24792e-18	3.30962							240091	0.0242075	6.48003
226949	2.24925e-18	5.63027							215736	0.0242388	2.18206
229637	2.25616e-18	4.79876							216681	0.0242395	2.56467
203655	2.2713e-18	6.31191							217678	0.0242555	2.19729
200977	2.27168e-18	5.20159							233201	0.0243143	2.11678
201944	2.27696e-18	6.02261							235651	0.0243217	2.644
224587	2.27711e-18	5.08421							222330	0.0243303	3.07201
218428	2.27913e-18	7.27707							210002	0.0243469	3.56115
203720	2.27952e-18	5.02899							219410	0.0243559	4.33955
237981	2.28048e-18	4.61302							226602	0.0243688	2.99593
225053	2.2977e-18	5.129							212843	0.0244603	2.23141
201061	2.30387e-18	6.11281							232469	0.0244763	2.36972
214821	2.31727e-18	7.0567							223542	0.0244813	2.13619
226732	2.3191e-18	5.89185							243332	0.0244966	2.13312
225281	2.32225e-18	6.16282							230962	0.0245086	3.60184
206542	2.32441e-18	6.53628							228956	0.0245281	2.97587
208581	2.32617e-18	6.95876							204962	0.0245412	2.01904
221517	2.35487e-18	4.86354							219850	0.0245957	2.00816
217899	2.36148e-18	4.47027							208022	0.0246478	3.24737
230676	2.364e-18	4.38394							230461	0.0246524	2.04914
1552790	2.37418e-18	6.88373							235209	0.0246818	2.27084
227493	2.37645e-18	6.06807							228557	0.0246868	4.21541
212548	2.38614e-18	5.81575							1559605	0.0247015	2.12126
225086	2.39016e-18	6.14349							1556436	0.0247142	2.51403
[truncated: 39,700 more rows]
